# Supplementary material for: Dearomatization of benzopyrylium triflates with sulfoxonium ylides
Source: Royal Society of Chemistry journal article supplement (doi:10.1039/d2cc02023h), 2022-01-01

**<sup>1</sup>H NMR (500 MHz, CDCl<sub>3</sub>) 1-methyl 2-(2,2,2-trichloroethyl) 7-oxo-1-phenyl-tetrahydro-2H-cyclopropa[b]quinoline-1,2-dicarboxylate**

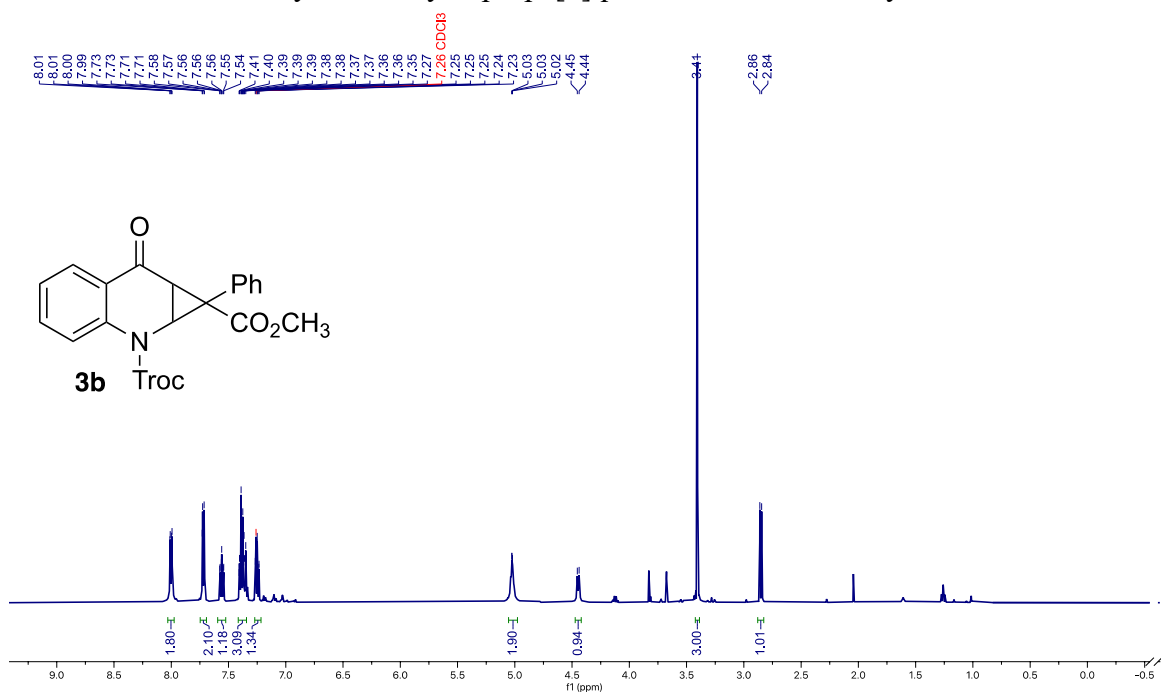

**<sup>13</sup>C NMR (126 MHz, CDCl<sub>3</sub>) 1-methyl 2-(2,2,2-trichloroethyl) 7-oxo-1-phenyl-tetrahydro-2H-cyclopropa[b]quinoline-1,2-dicarboxylate**

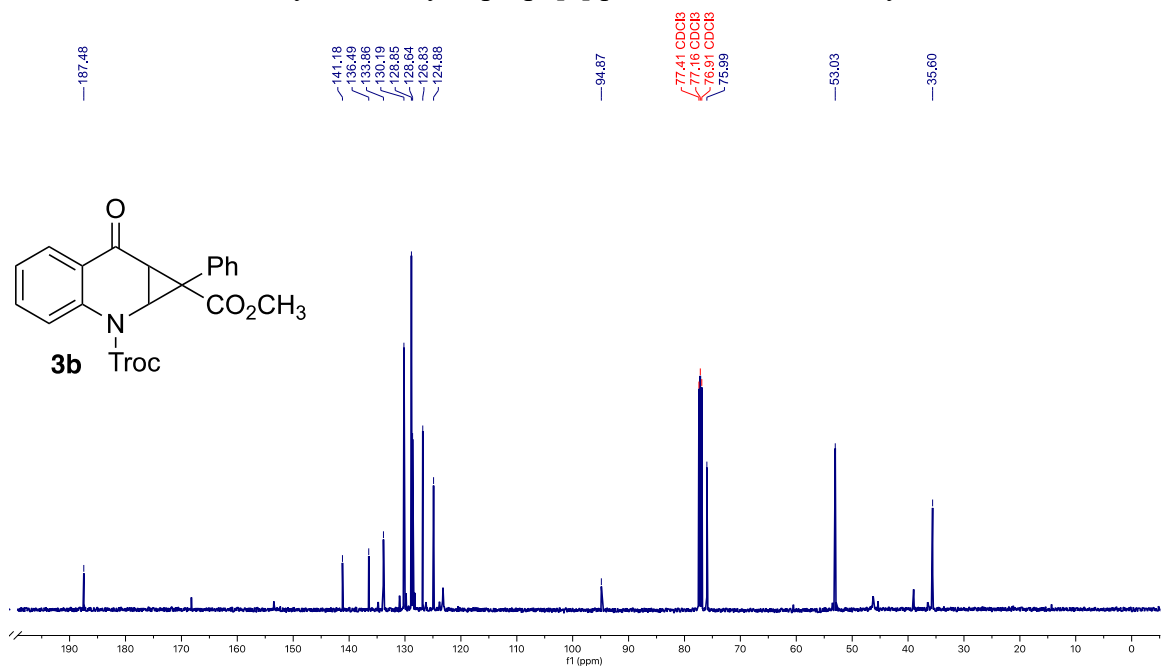

**<sup>1</sup>H NMR (500 MHz, CDCl<sub>3</sub>) Ethyl 1-phenyl-tetrahydrocyclopropa[b]chromene-1-carboxylate**

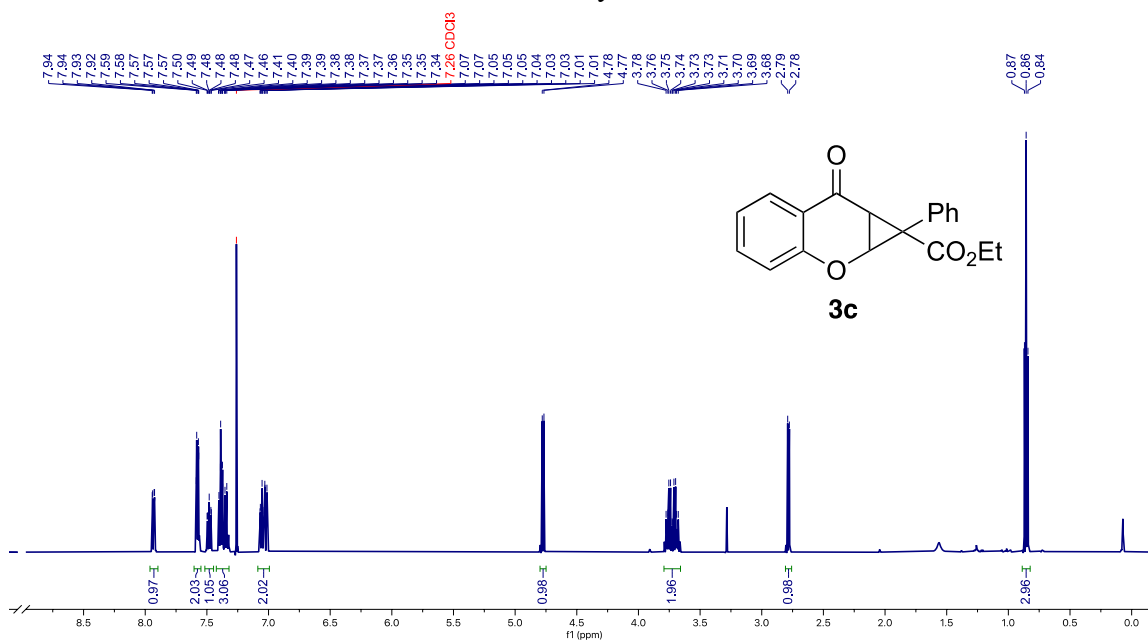

**<sup>13</sup>C NMR (126 MHz, CDCl<sub>3</sub>) Ethyl 1-phenyl-tetrahydrocyclopropa[b]chromene-1-carboxylate**

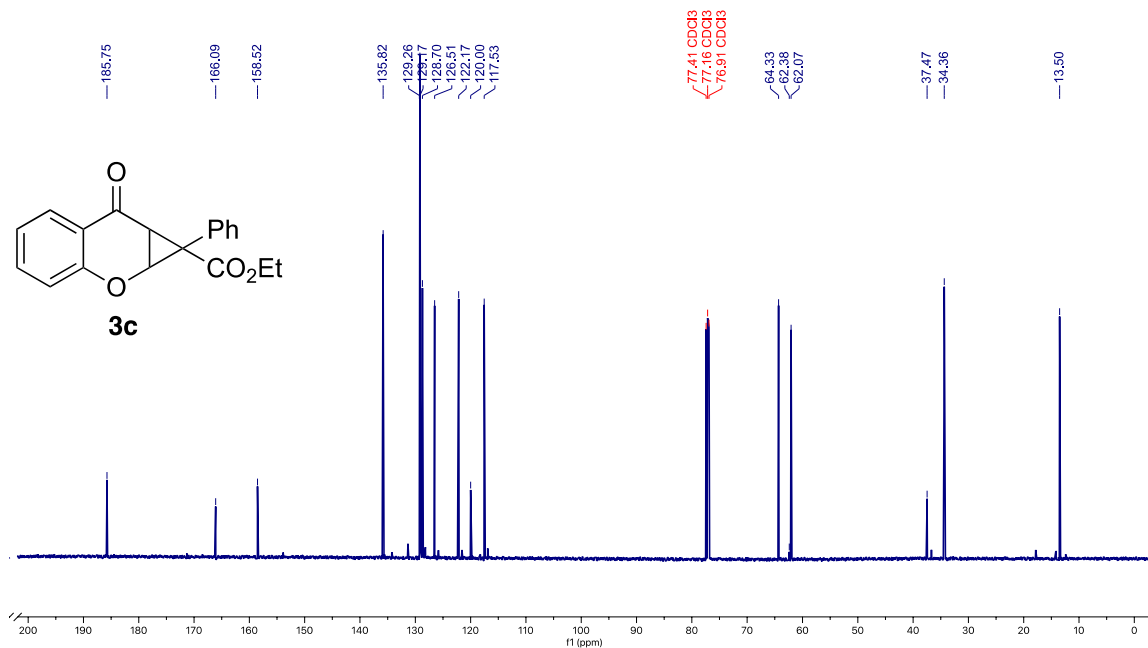

**<sup>1</sup>H NMR (500 MHz, CDCl<sub>3</sub>) 1-ethyl 2-(2,2,2-trichloroethyl) 7-oxo-1-phenyl-tetrahydro-2H-cyclopropa[b]quinoline-1,2-dicarboxylate**

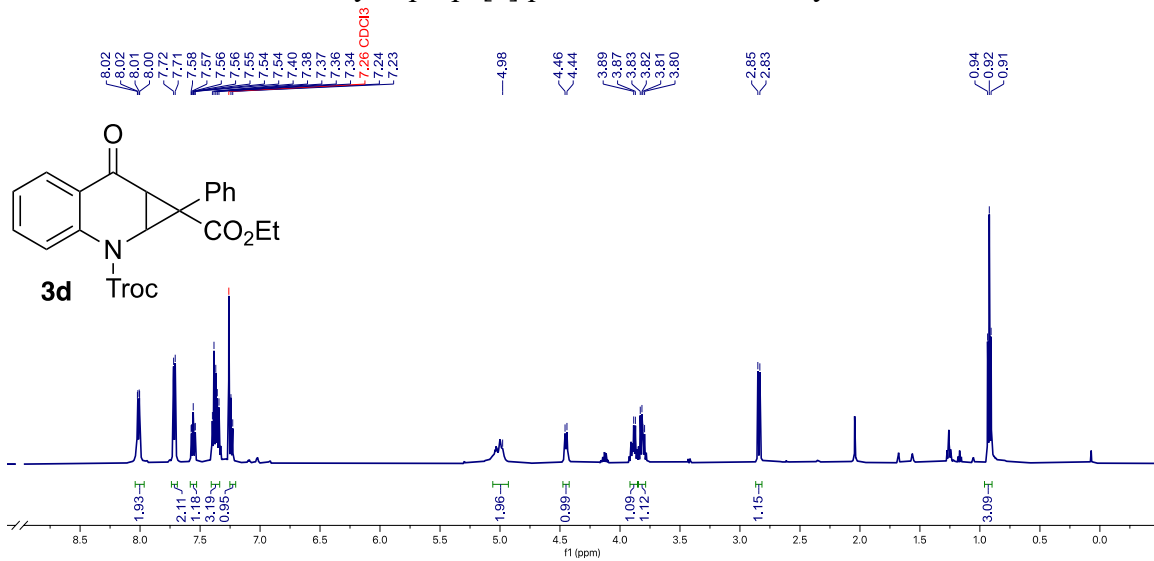

**<sup>13</sup>C NMR (126 MHz, CDCl<sub>3</sub>) 1-ethyl 2-(2,2,2-trichloroethyl) 7-oxo-1-phenyl-tetrahydro-2H-cyclopropa[b]quinoline-1,2-dicarboxylate**

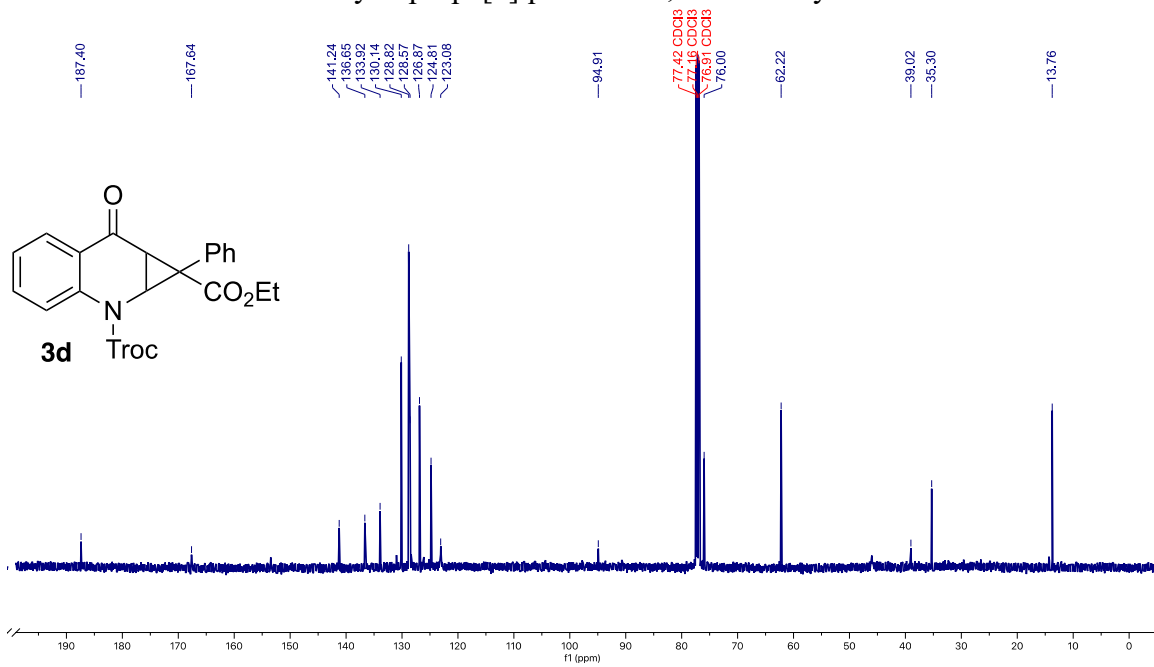

**<sup>1</sup>H NMR (500 MHz, CDCl<sub>3</sub>) Benzyl 1-phenyl-1-tetrahydrocyclopropa[b]chromene-1-carboxylate**

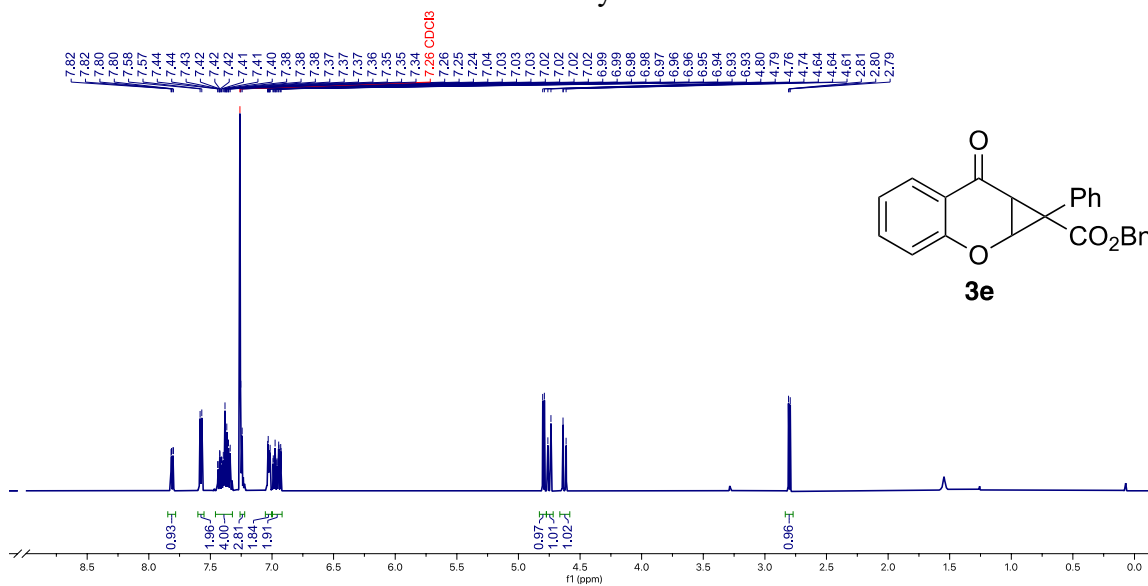

**<sup>13</sup>C NMR (126 MHz, CDCl<sub>3</sub>) Benzyl 1-phenyl-1-tetrahydrocyclopropa[b]chromene-1-carboxylate**

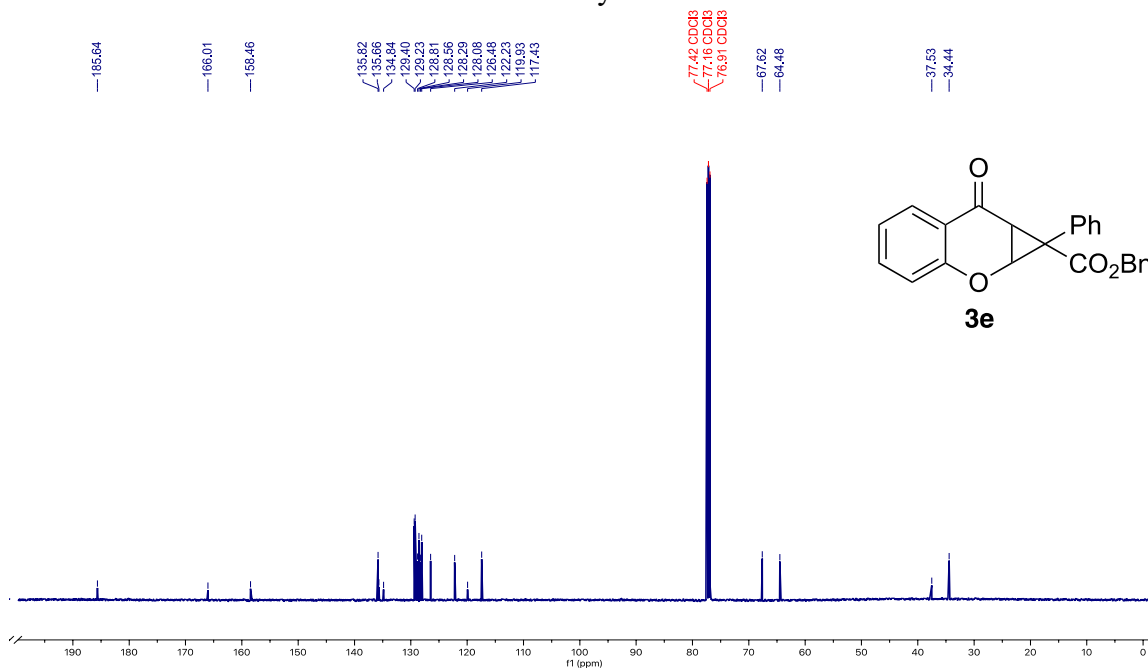

**<sup>1</sup>H NMR (500 MHz, CDCl<sub>3</sub>) 2,2,2-trichloroethyl 1-phenyl-tetrahydrocyclopropa[*b*]chromene-1-carboxylate**

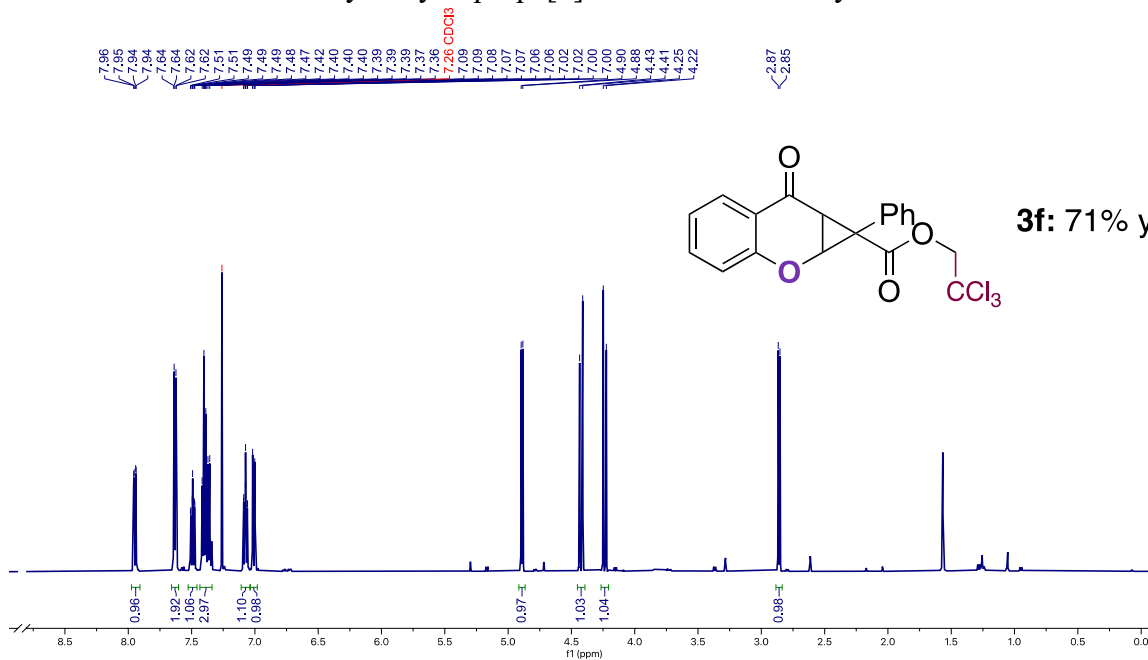

**<sup>13</sup>C NMR (126 MHz, CDCl<sub>3</sub>) 2,2,2-trichloroethyl 1-phenyl-tetrahydrocyclopropa[*b*]chromene-1-carboxylates**

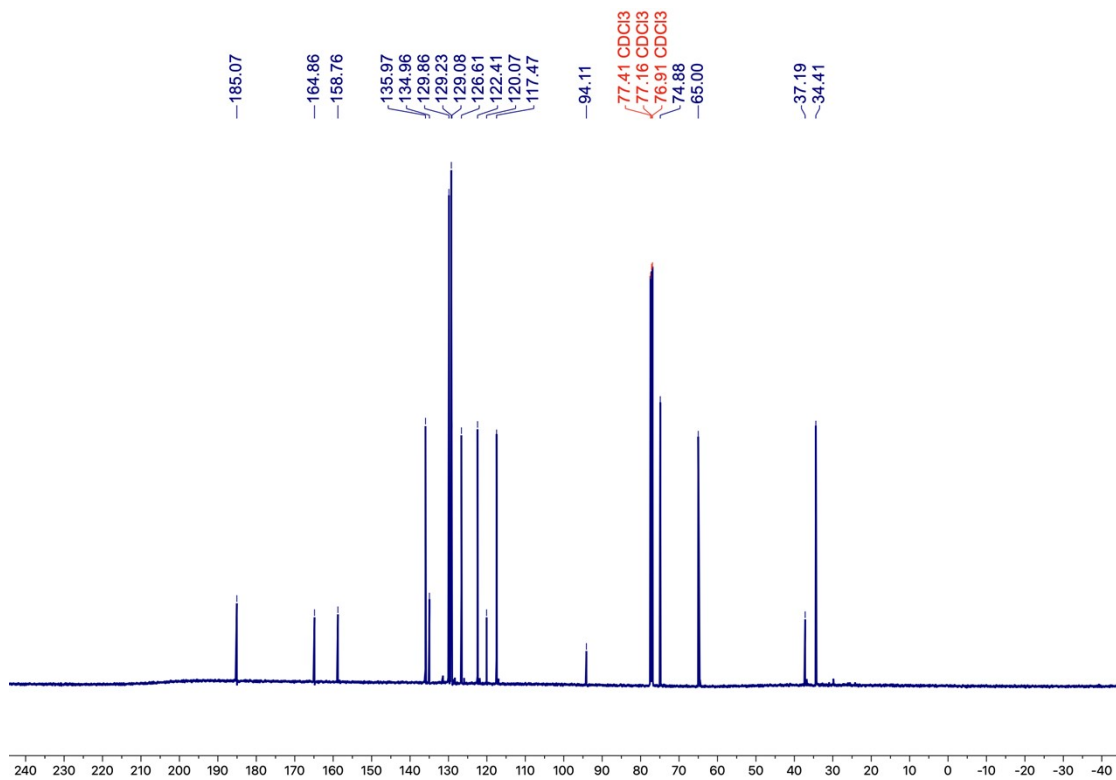

**<sup>1</sup>H NMR (500 MHz, CDCl<sub>3</sub>) Ethyl 1-(4-bromophenyl)-7-oxo-tetrahydrocyclopropa[b]chromene-1-carboxylate**

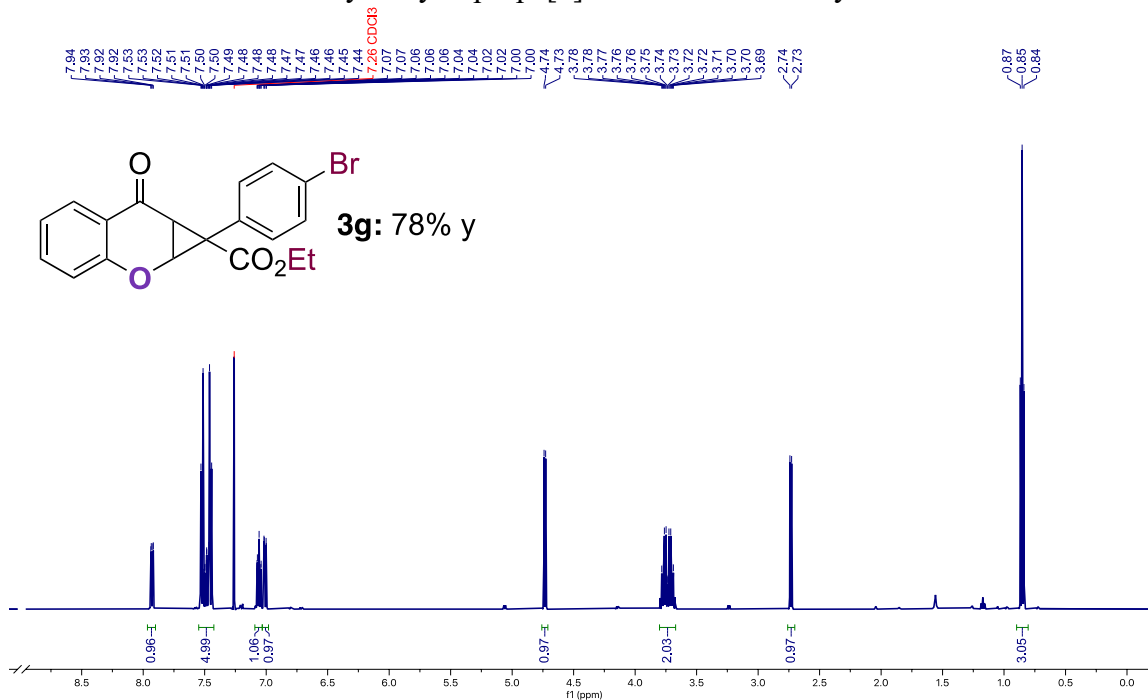

**<sup>13</sup>C NMR (125 MHz, CDCl<sub>3</sub>) Ethyl 1-(4-bromophenyl)-7-oxo-tetrahydrocyclopropa[b]chromene-1-carboxylate**

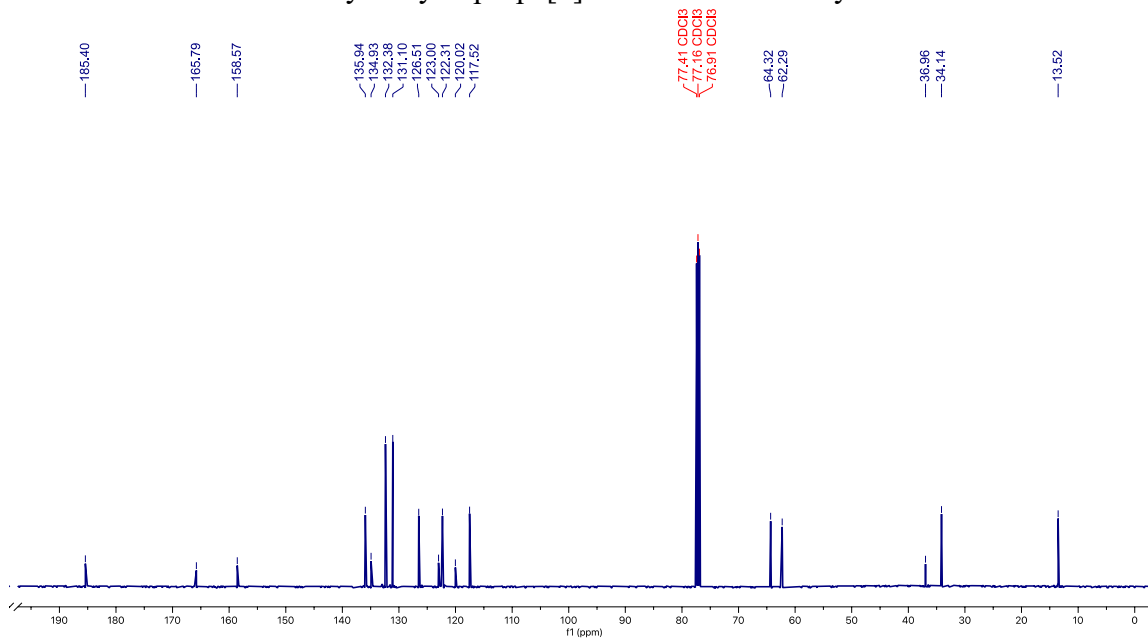

**<sup>1</sup>H NMR (500 MHz, CDCl<sub>3</sub>) Methyl 7-oxo-1-(p-tolyl)-tetrahydrocyclopropa[b]chromene-1-carboxylate**

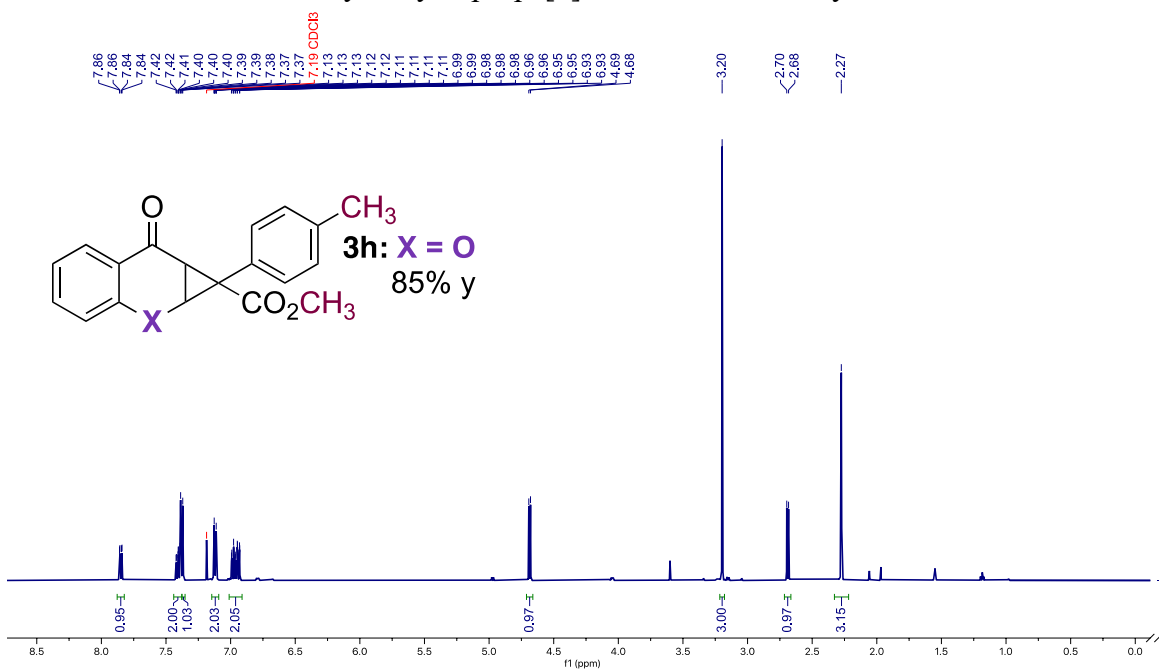

**<sup>13</sup>C NMR (125 MHz, CDCl<sub>3</sub>) Methyl 7-oxo-1-(p-tolyl)-tetrahydrocyclopropa[b]chromene-1-carboxylate**

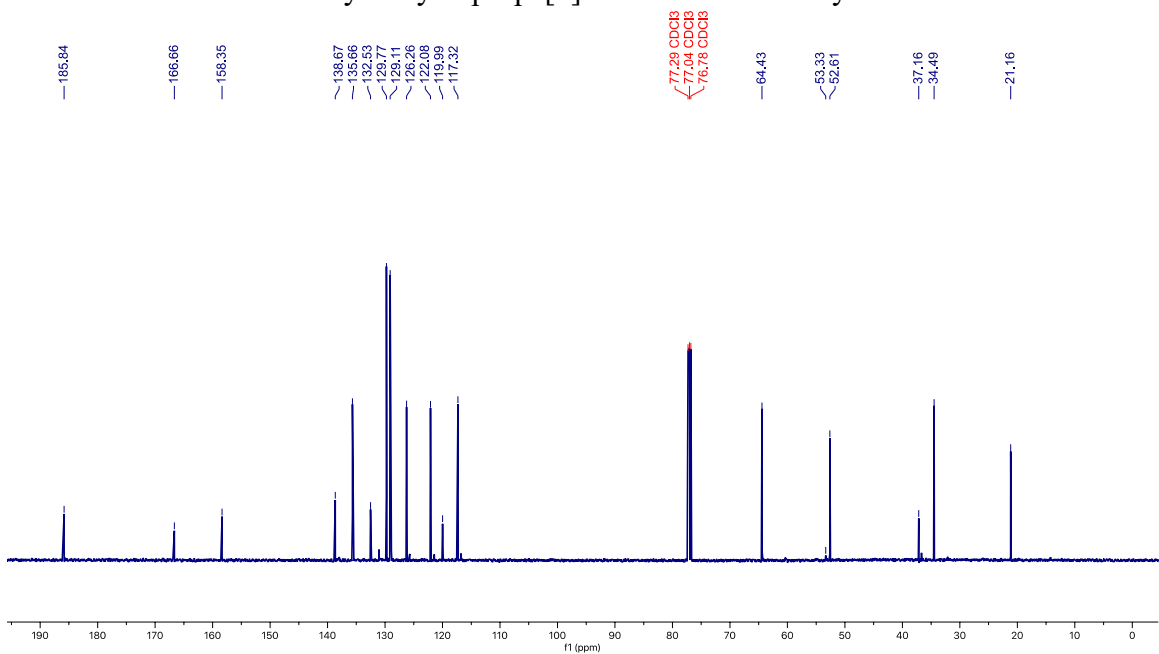



**<sup>1</sup>H NMR (500 MHz, CDCl<sub>3</sub>) 1-methyl 2-(2,2,2-trichloroethyl) 7-oxo-1-(p-tolyl)-tetrahydro-2H-cyclopropa[b]quinoline-1,2-dicarboxylate**

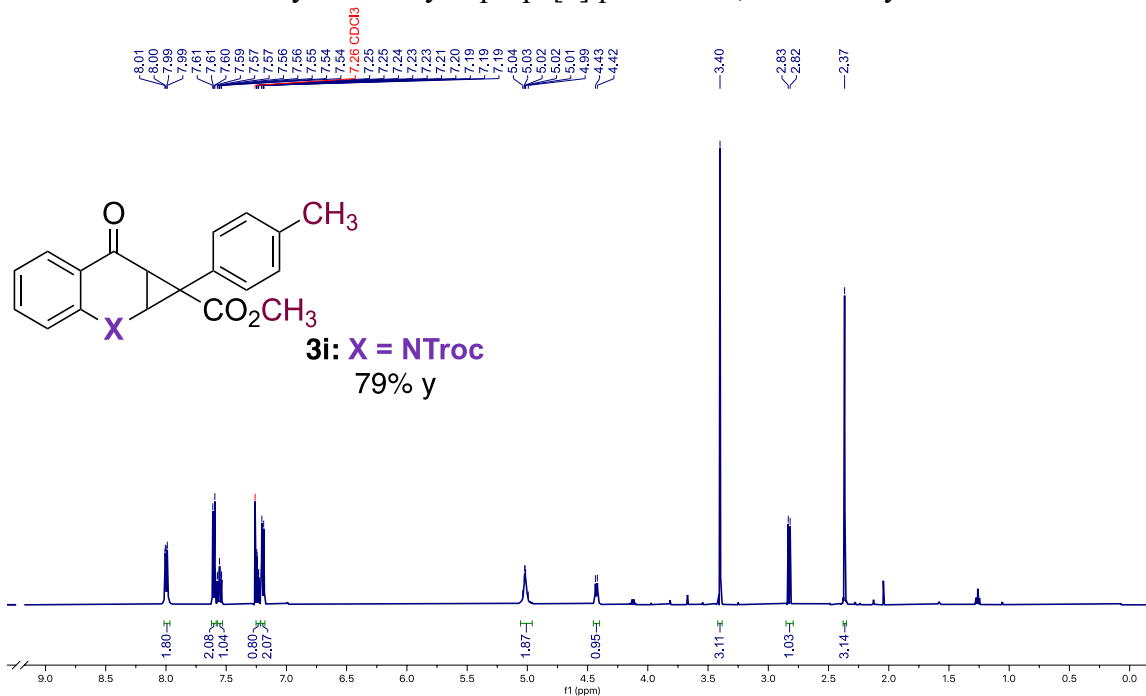

**<sup>13</sup>C NMR (126 MHz, CDCl<sub>3</sub>) 1-methyl 2-(2,2,2-trichloroethyl) 7-oxo-1-(p-tolyl)-tetrahydro-2H-cyclopropa[b]quinoline-1,2-dicarboxylate**

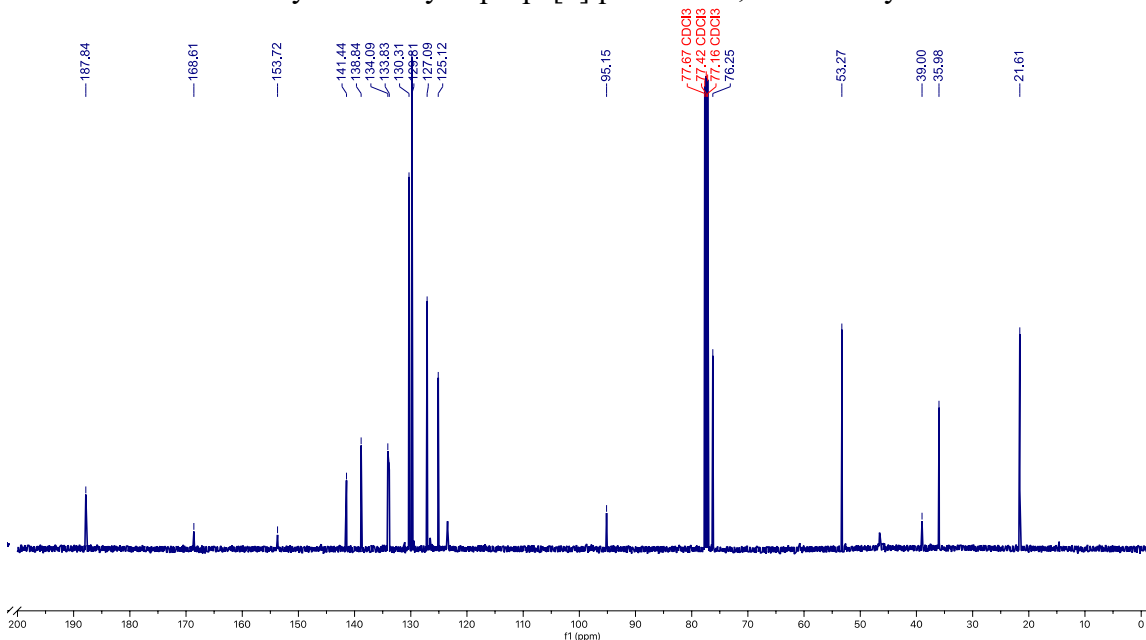

**<sup>1</sup>H NMR (500 MHz, CDCl<sub>3</sub>) Methyl 1-(3,5-dimethylphenyl)-1-tetrahydrocyclopropa[b]chromene-1-carboxylate**

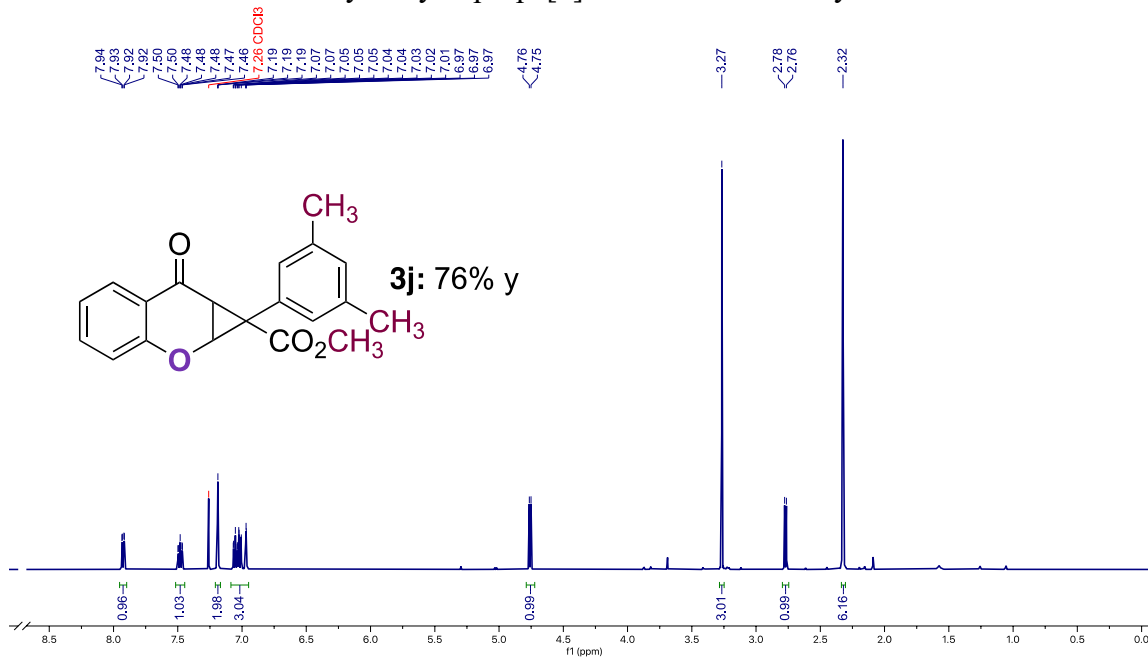

**<sup>13</sup>C NMR (126 MHz, CDCl<sub>3</sub>) Methyl 1-(3,5-dimethylphenyl)-1-tetrahydrocyclopropa[b]chromene-1-carboxylate**

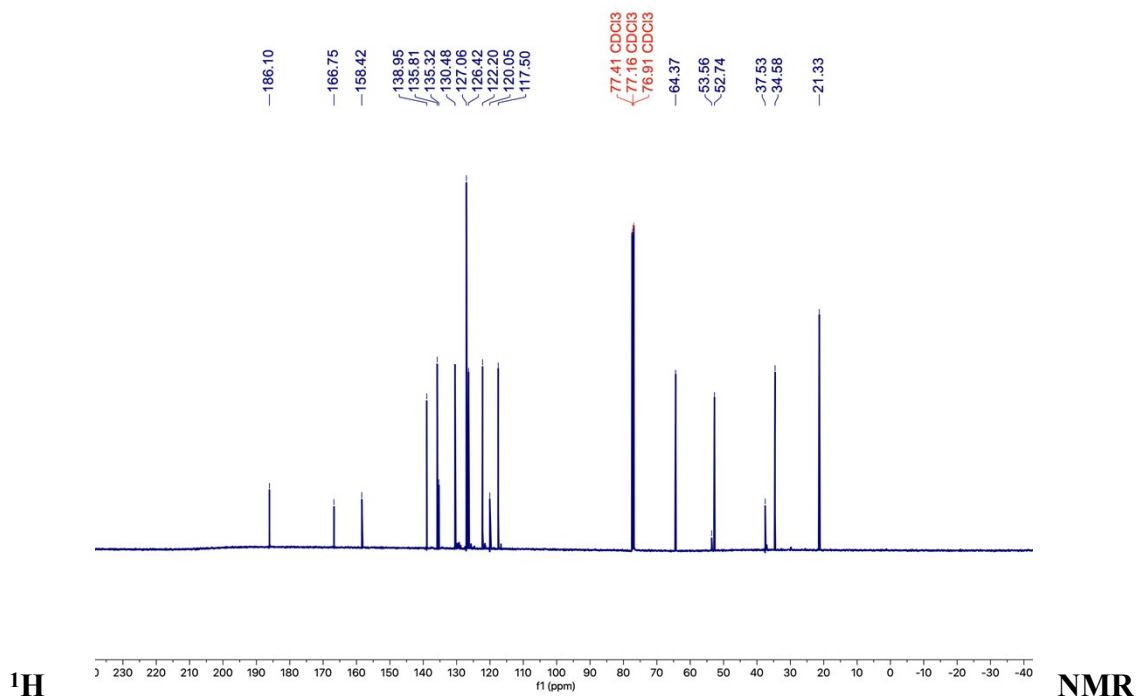

CH<sub>3</sub>

(500 MHz, CDCl<sub>3</sub>) 1-methyl 2-(2,2,2-trichloroethyl) 1-(2-methoxyphenyl)-7-oxo-tetrahydro-2H-cyclopropa[b]quinoline-1,2-dicarboxylate

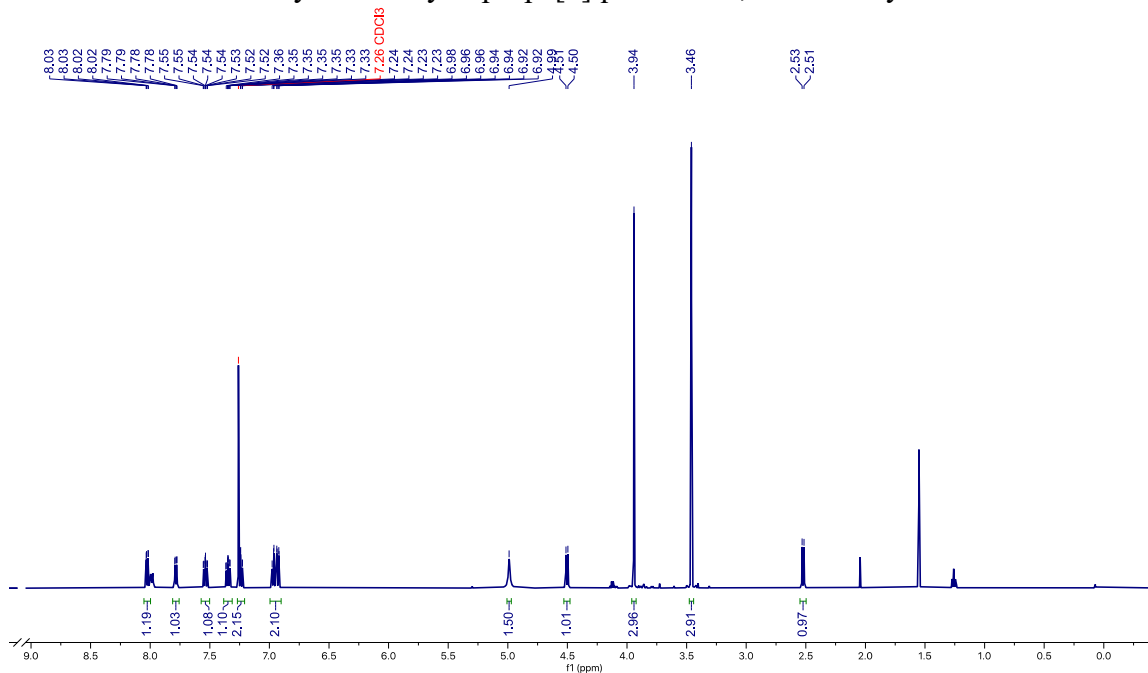

<sup>13</sup>C NMR (126 MHz, CDCl<sub>3</sub>) 1-methyl 2-(2,2,2-trichloroethyl) 1-(2-methoxyphenyl)-7-oxo-tetrahydro-2H-cyclopropa[b]quinoline-1,2-dicarboxylate

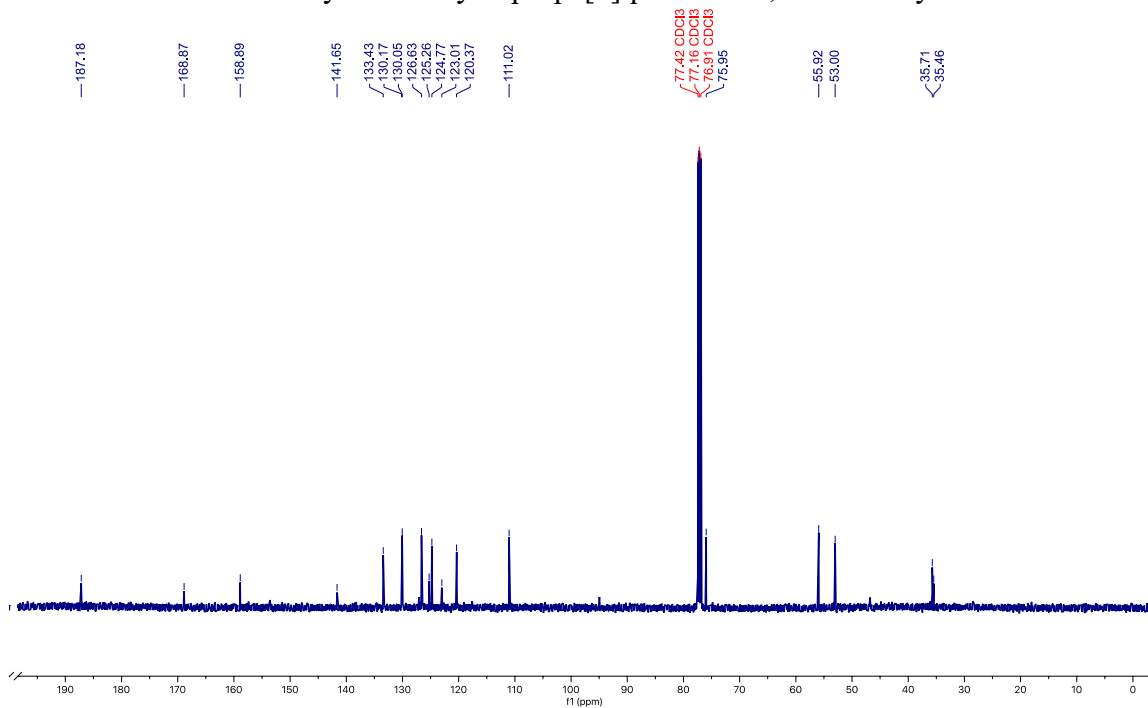

### <sup>1</sup>H NMR (500 MHz, CDCl<sub>3</sub>) Methyl 5-methyl-1-phenyl-tetrahydrocyclopropa[b]chromene-1-carboxylate

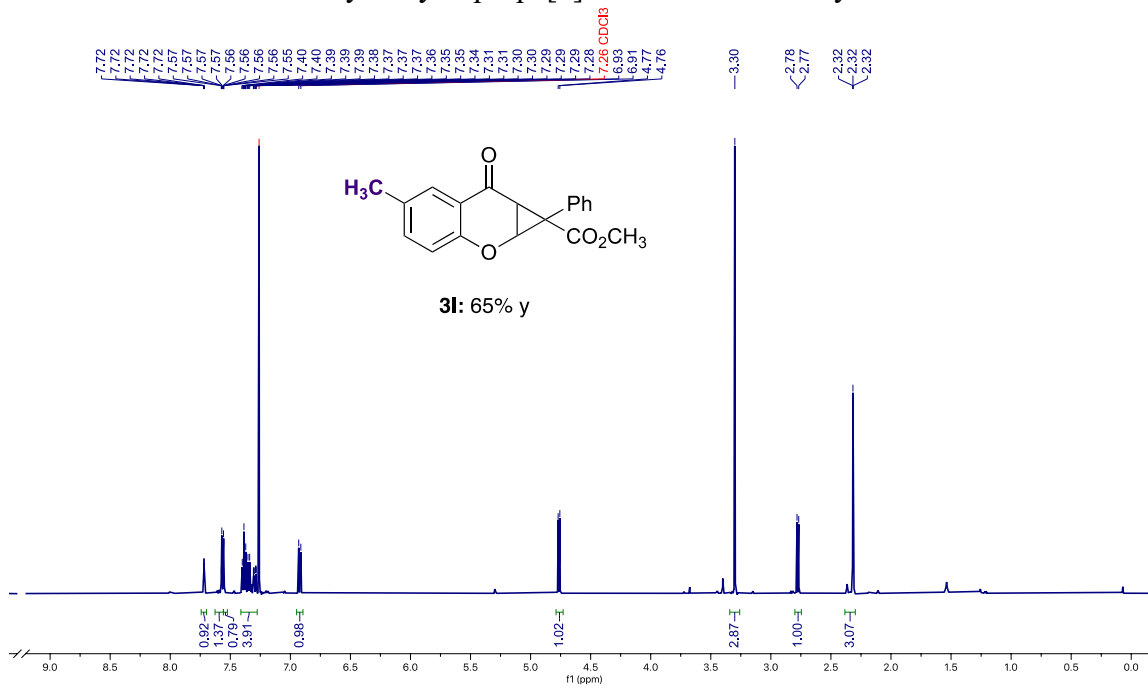

### <sup>13</sup>C NMR (126 MHz, CDCl<sub>3</sub>) Methyl 5-methyl-1-phenyl-tetrahydrocyclopropa[b]chromene-1-carboxylate

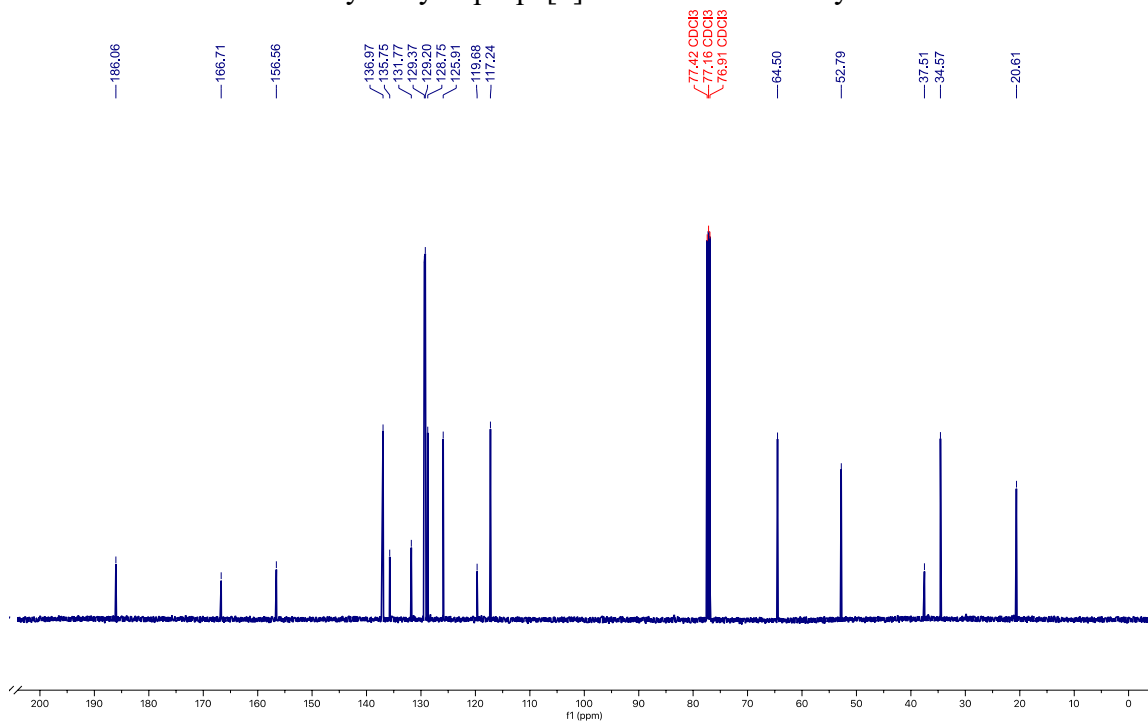

**<sup>1</sup>H NMR (500 MHz, CDCl<sub>3</sub>) Methyl 5-bromo-1-phenyl-tetrahydrocyclopropa[*b*]chromene-1-carboxylate**

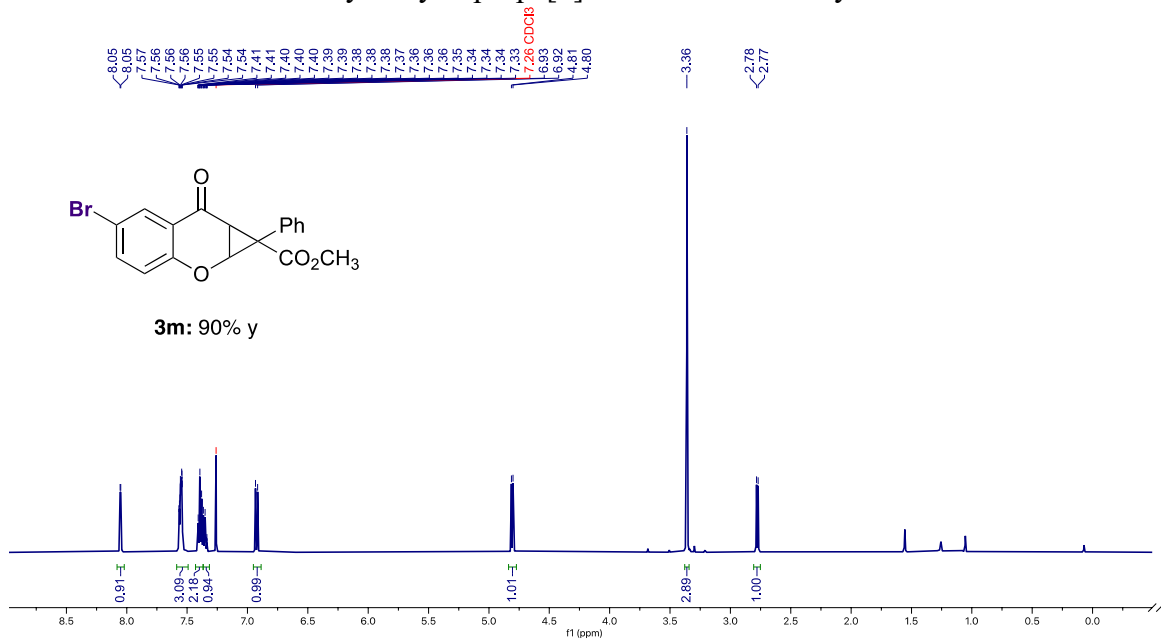

**<sup>13</sup>C NMR (126 MHz, CDCl<sub>3</sub>) Methyl 5-bromo-1-phenyl-tetrahydrocyclopropa[*b*]chromene-1-carboxylate**

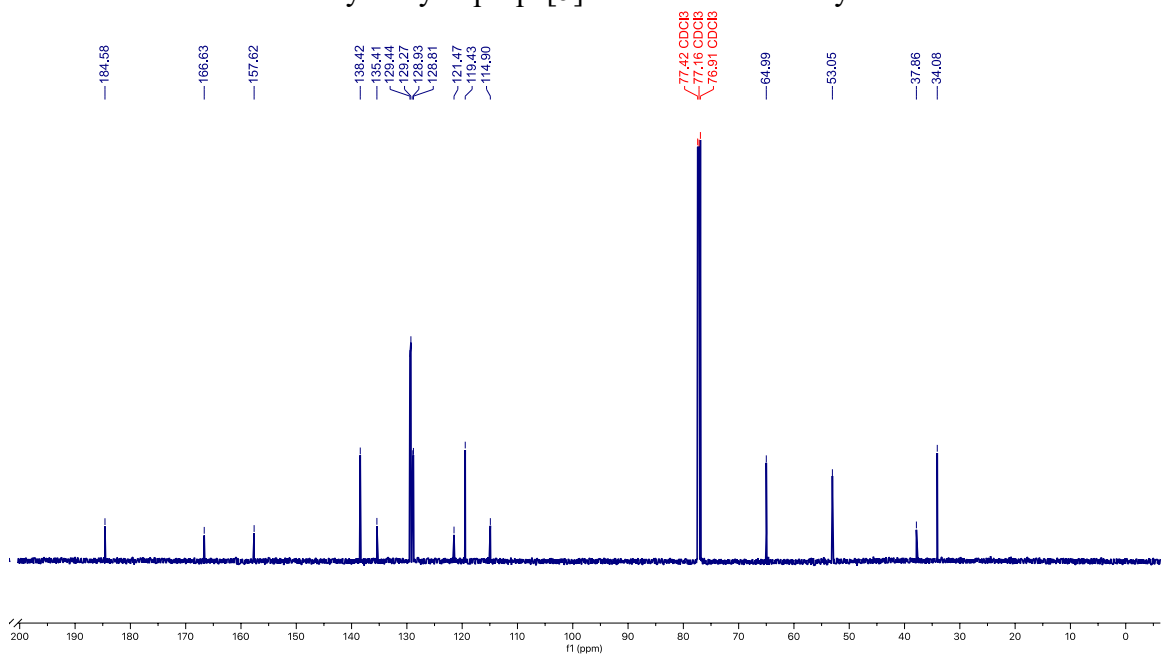

**<sup>1</sup>H NMR (500 MHz, CDCl<sub>3</sub>) Methyl 5-fluoro-7-oxo-1-phenyl-tetrahydrocyclopropa[b]chromene-1-carboxylate**

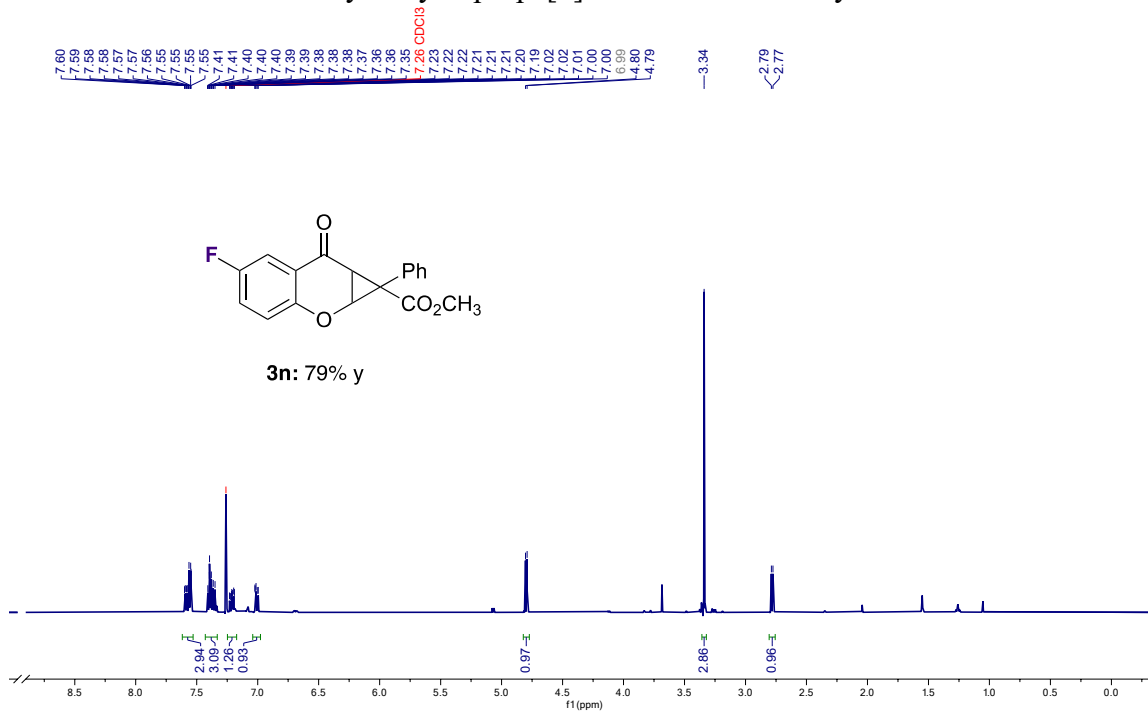

**<sup>13</sup>C NMR (126 MHz, CDCl<sub>3</sub>) Methyl 5-fluoro-7-oxo-1-phenyl-tetrahydrocyclopropa[b]chromene-1-carboxylate**

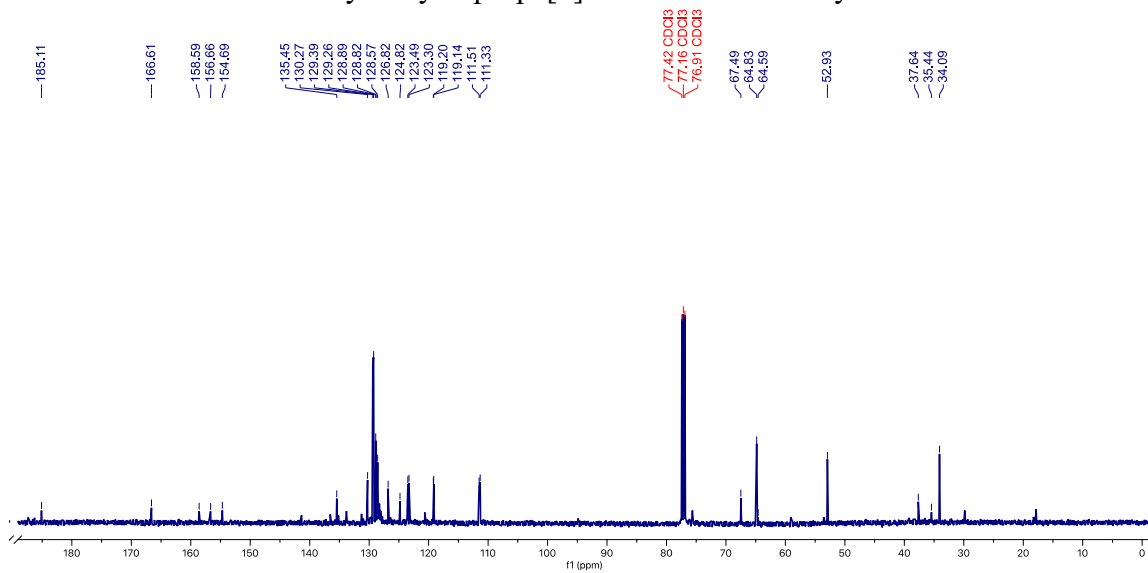

**<sup>1</sup>H NMR (500 MHz, CDCl<sub>3</sub>) Methyl 6-fluoro-7-oxo-1-phenyl-tetrahydrocyclopropa[b]chromene-1-carboxylate**

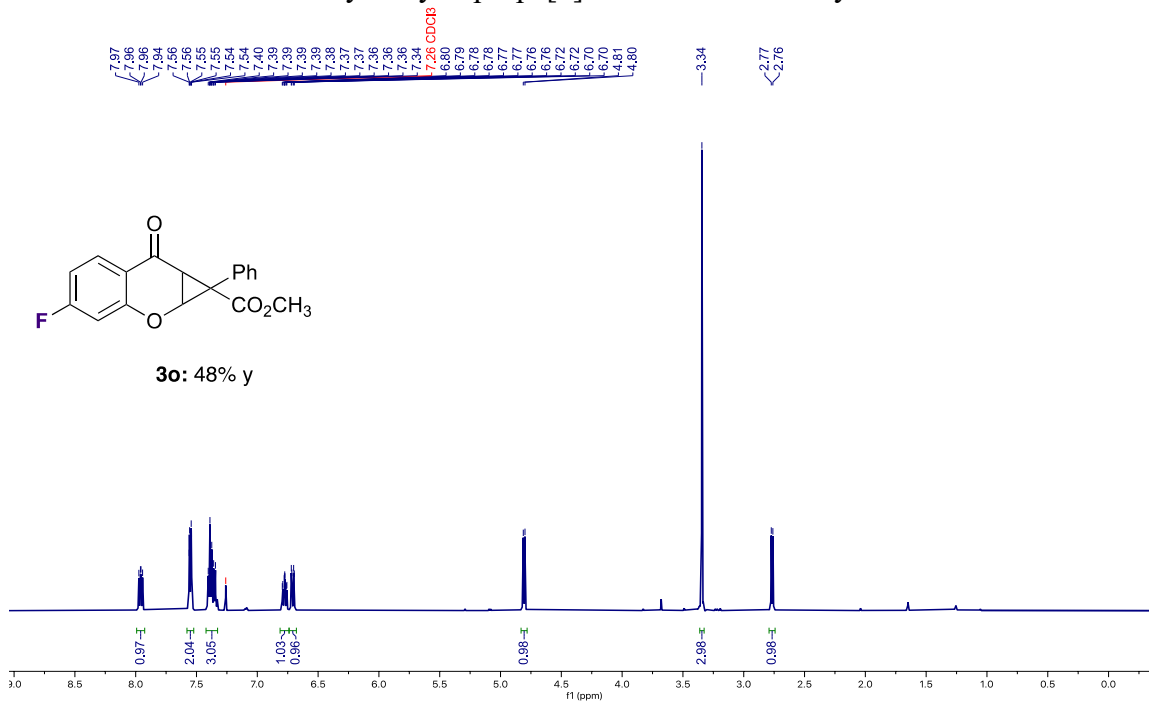

**<sup>13</sup>C NMR (126 MHz, CDCl<sub>3</sub>) Methyl 6-fluoro-7-oxo-1-phenyl-tetrahydrocyclopropa[b]chromene-1-carboxylate**

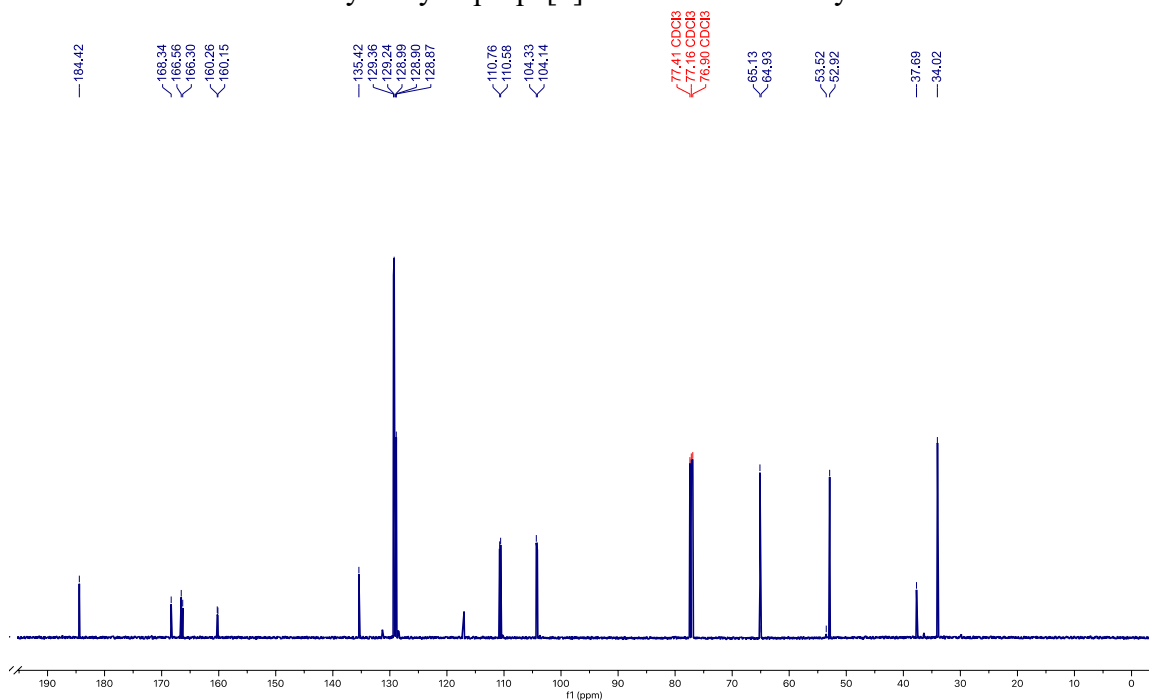

**<sup>1</sup>H NMR (500 MHz, CDCl<sub>3</sub>) Methyl 8-bromo-6-chloro-1-phenyl-tetrahydrocyclopropa[b]chromene-1-carboxylate**

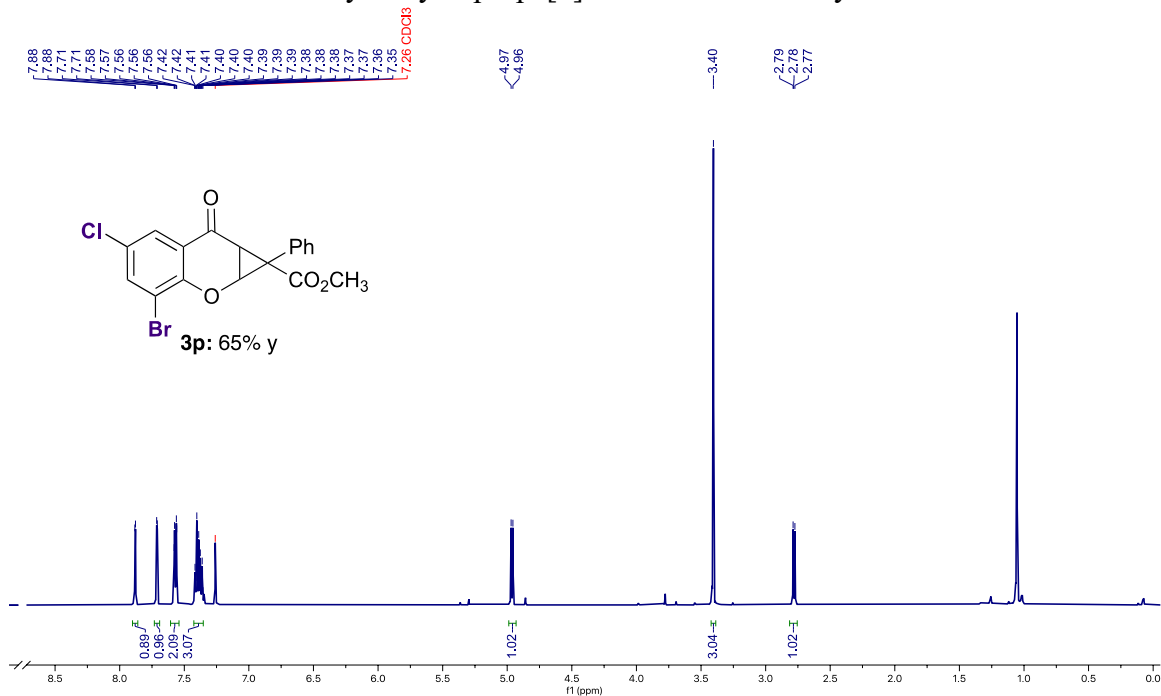

**<sup>13</sup>C NMR (126 MHz, CDCl<sub>3</sub>) Methyl 8-bromo-6-chloro-1-phenyl-tetrahydrocyclopropa[b]chromene-1-carboxylate**

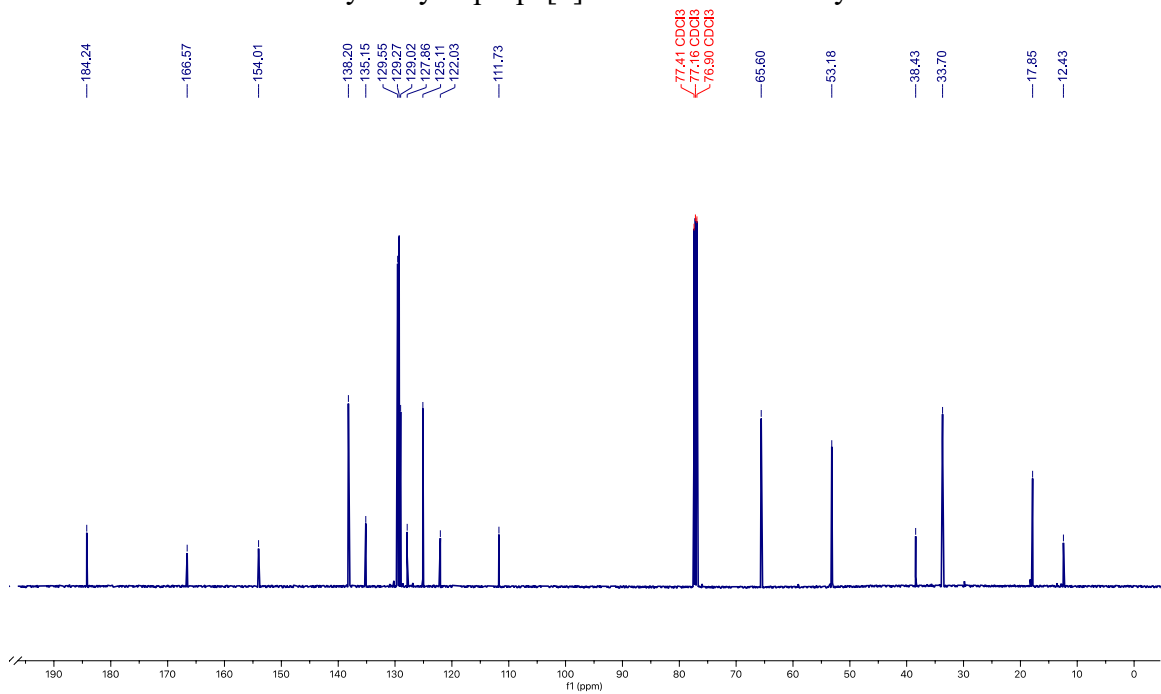



**<sup>1</sup>H NMR (500 MHz, CDCl<sub>3</sub>) Methyl 7-oxo-1,3-diphenyl-tetrahydrocyclopropa[b]chromene-1-carboxylate**

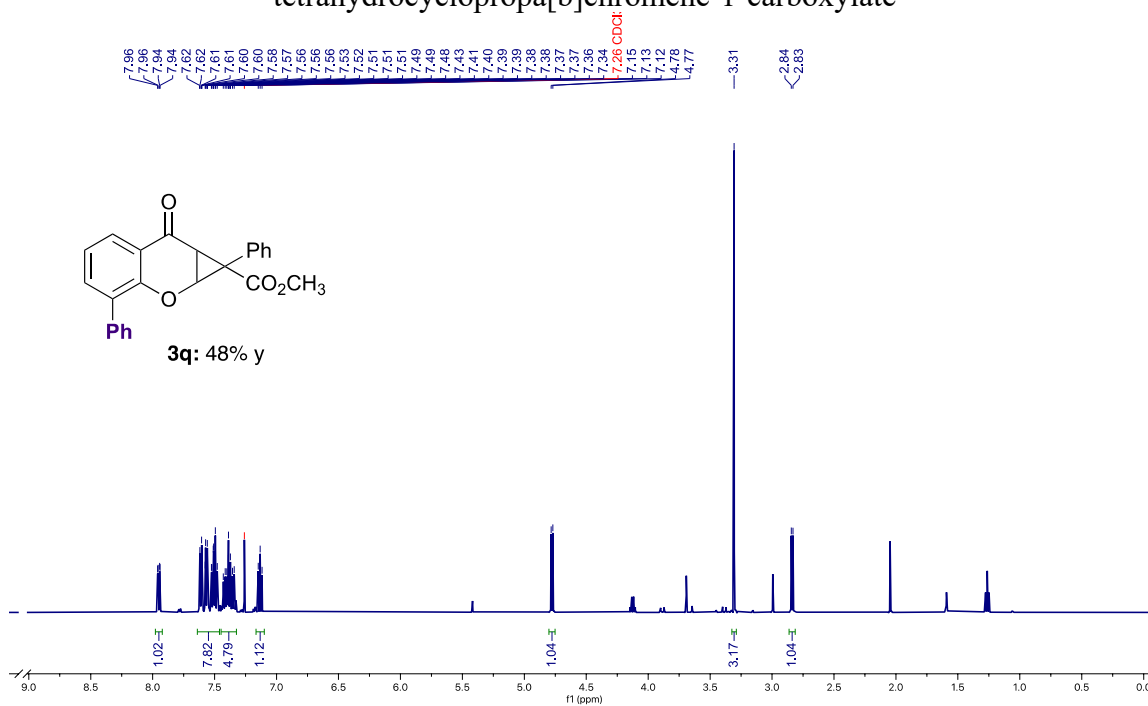

**<sup>13</sup>C NMR (126 MHz, CDCl<sub>3</sub>) Methyl 7-oxo-1,3-diphenyl-tetrahydrocyclopropa[b]chromene-1-carboxylate**

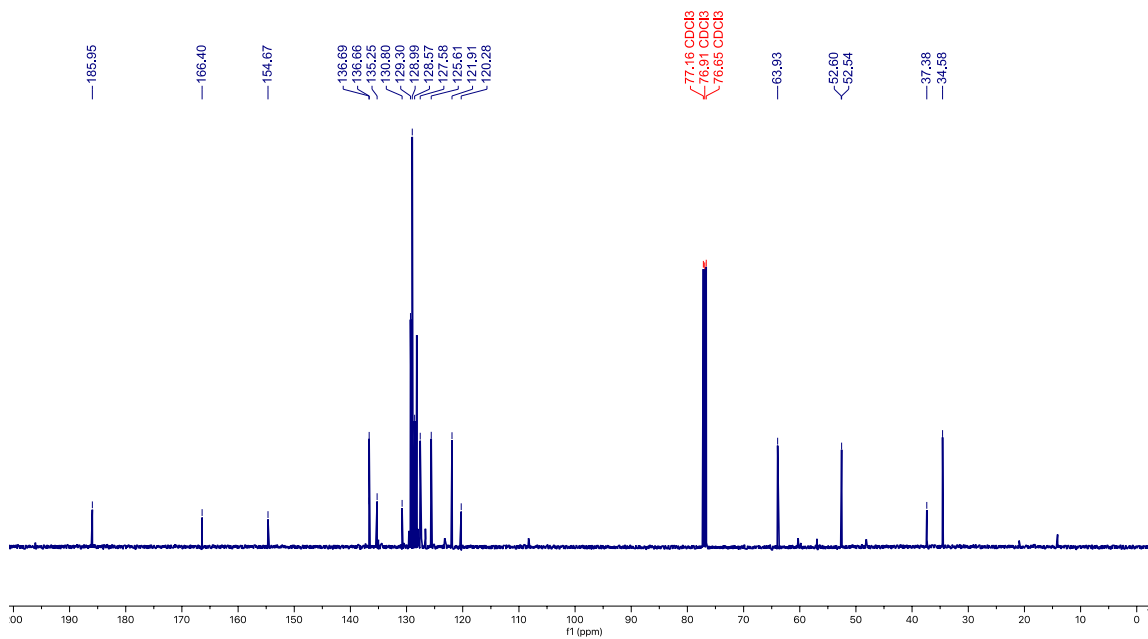

**<sup>1</sup>H NMR (500 MHz, CDCl<sub>3</sub>) Methyl 6-(3,5-bis(trifluoromethyl)phenyl)-1-phenyl-tetrahydrocyclopropa[b]chromene-1-carboxylate**

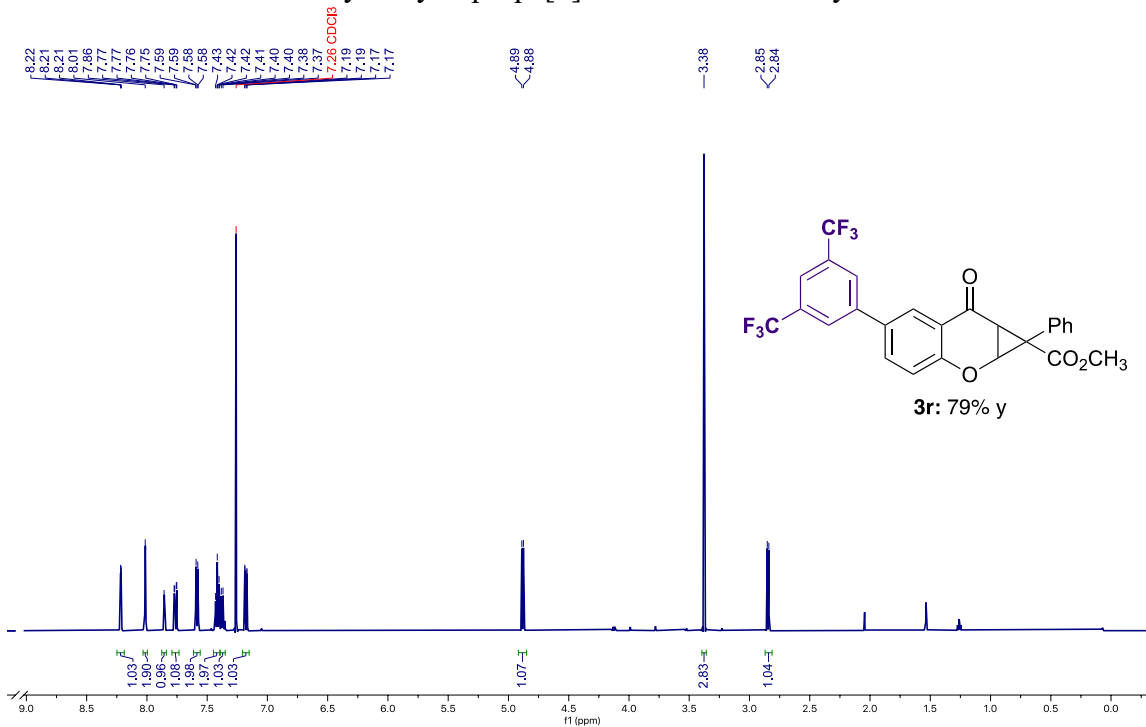

**<sup>13</sup>C NMR (126 MHz, CDCl<sub>3</sub>) Methyl 6-(3,5-bis(trifluoromethyl)phenyl)-1-phenyl-tetrahydrocyclopropa[b]chromene-1-carboxylate**

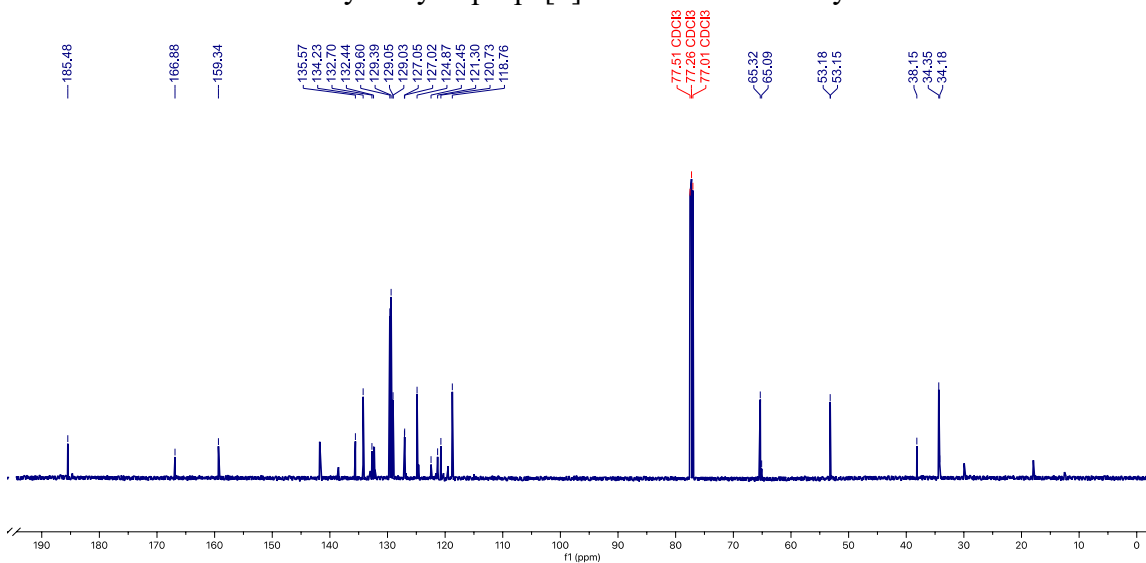

**<sup>1</sup>H NMR (500 MHz, CDCl<sub>3</sub>) Methyl 4-methoxy-7-oxo-1-phenyl-tetrahydrocyclopropa[b]chromene-1-carboxylate**

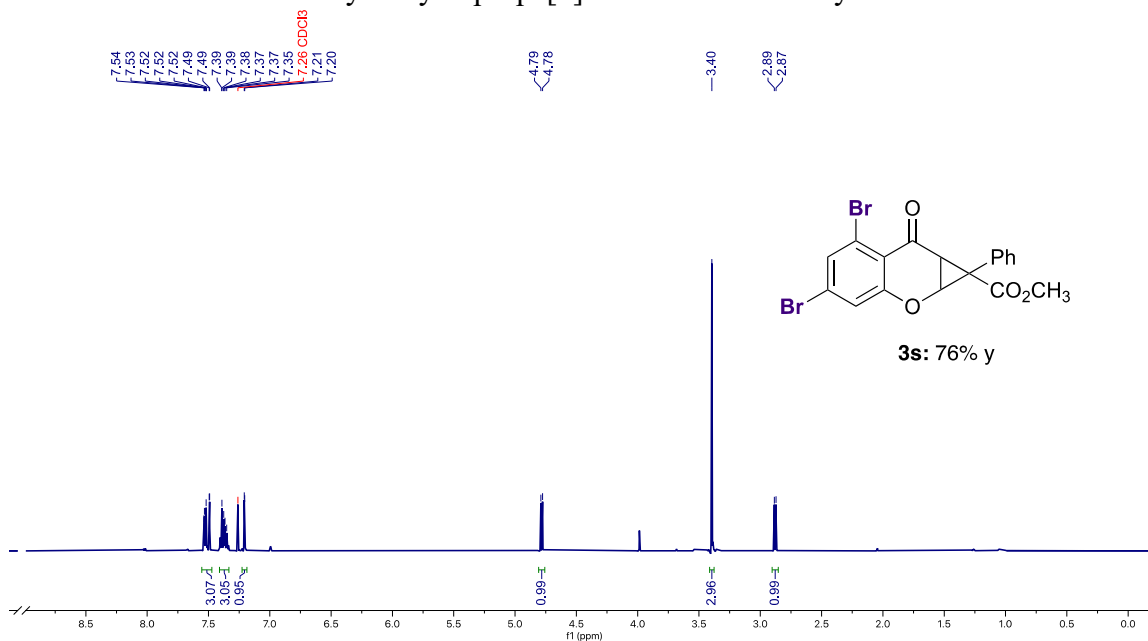

**<sup>13</sup>C NMR (125 MHz, CDCl<sub>3</sub>) Methyl 4-methoxy-7-oxo-1-phenyl-tetrahydrocyclopropa[b]chromene-1-carboxylate**

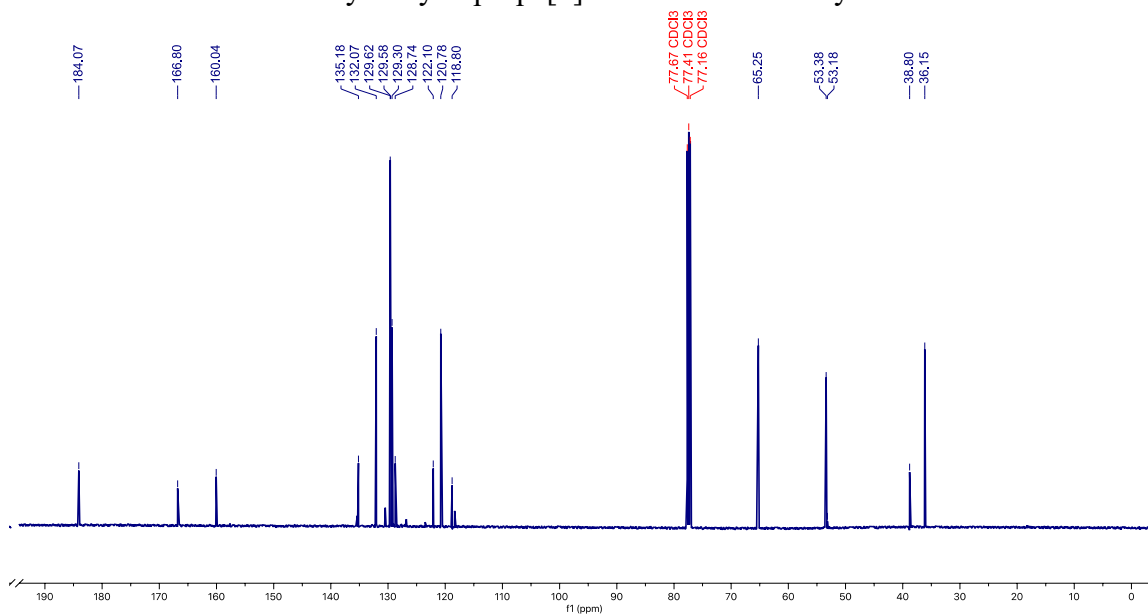

**<sup>1</sup>H NMR (500 MHz, CDCl<sub>3</sub>) Ethyl 1-(4-bromophenyl)-6-methoxy-tetrahydrocyclopropa[b]chromene-1-carboxylate**

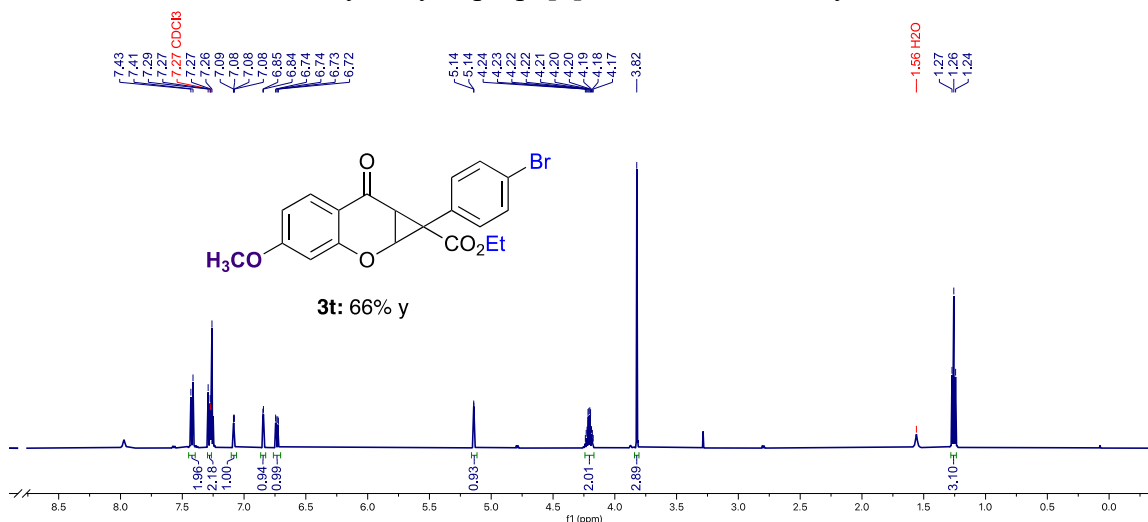

**<sup>13</sup>C NMR (125 MHz, CDCl<sub>3</sub>) Ethyl 1-(4-bromophenyl)-6-methoxy-tetrahydrocyclopropa[b]chromene-1-carboxylate**

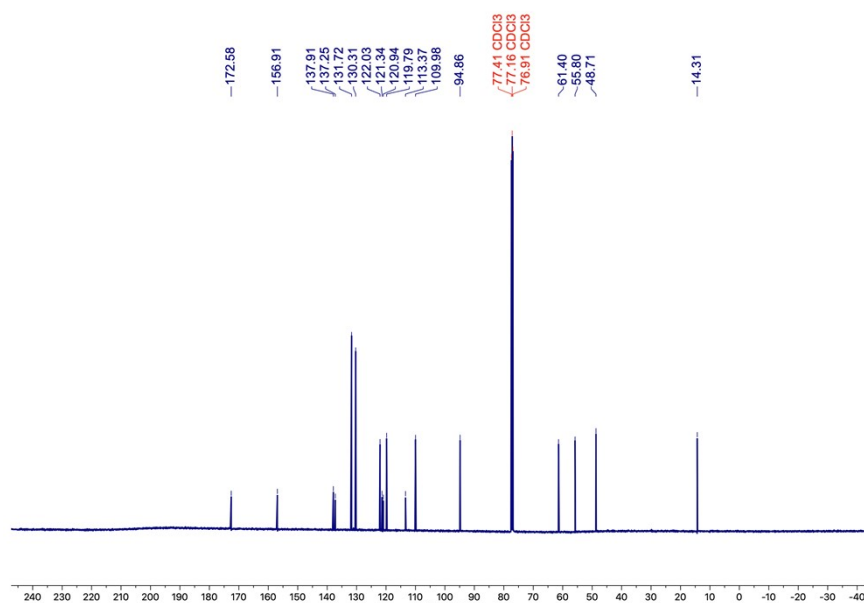

**<sup>1</sup>H NMR (500 MHz, CDCl<sub>3</sub>) Methyl 5-bromo-7-oxo-1-(*p*-tolyl)-tetrahydrocyclopropa[*b*]chromene-1-carboxylate**

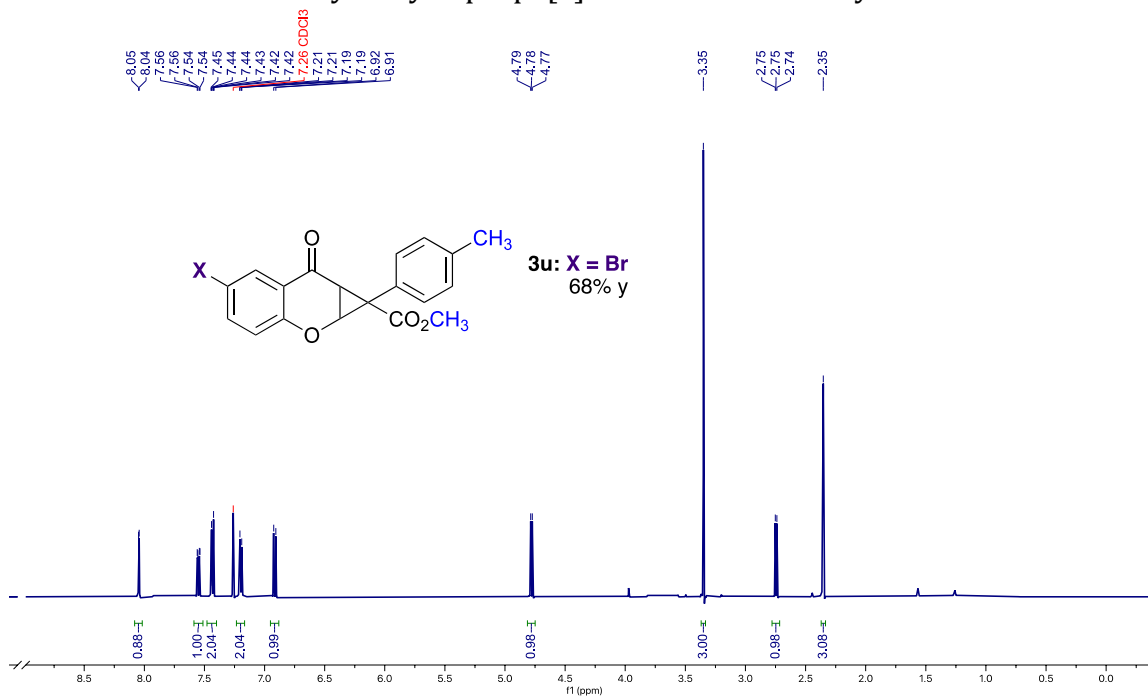

**<sup>13</sup>C NMR (126 MHz, CDCl<sub>3</sub>) Methyl 5-bromo-7-oxo-1-(*p*-tolyl)-tetrahydrocyclopropa[*b*]chromene-1-carboxylate**

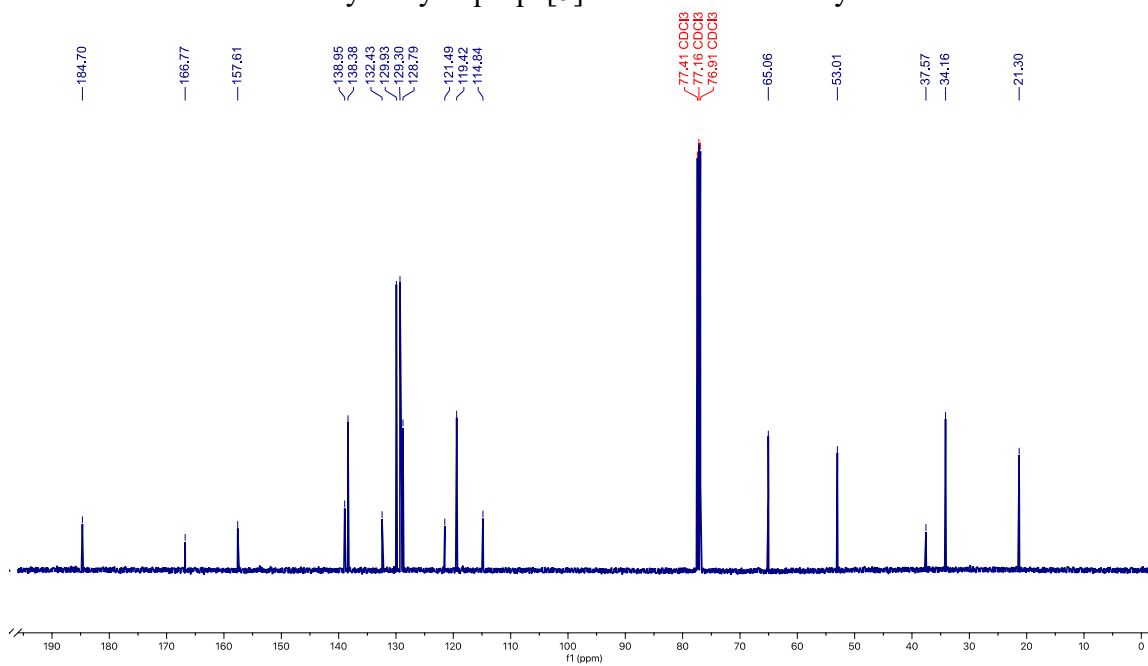

**<sup>1</sup>H NMR (500 MHz, CDCl<sub>3</sub>) Methyl 7-oxo-1-(p-tolyl)-5-(trifluoromethyl)-tetrahydrocyclopropa[b]chromene-1-carboxylate**

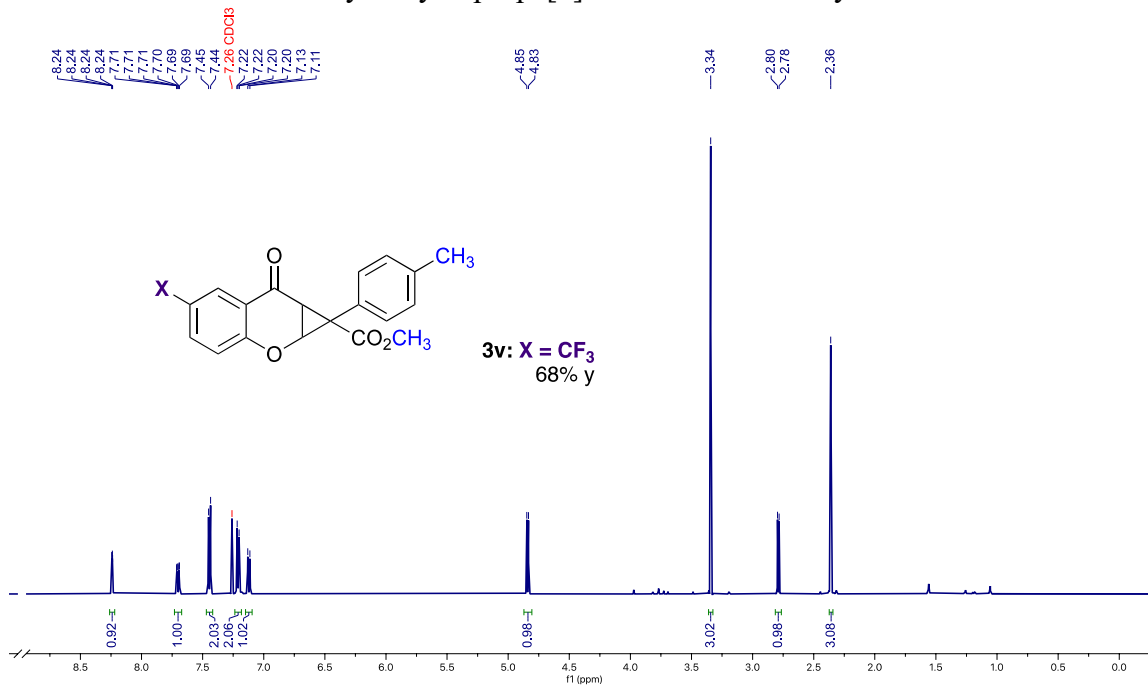

**<sup>13</sup>C NMR (125 MHz, CDCl<sub>3</sub>) Methyl 7-oxo-1-(p-tolyl)-5-(trifluoromethyl)-tetrahydrocyclopropa[b]chromene-1-carboxylate**

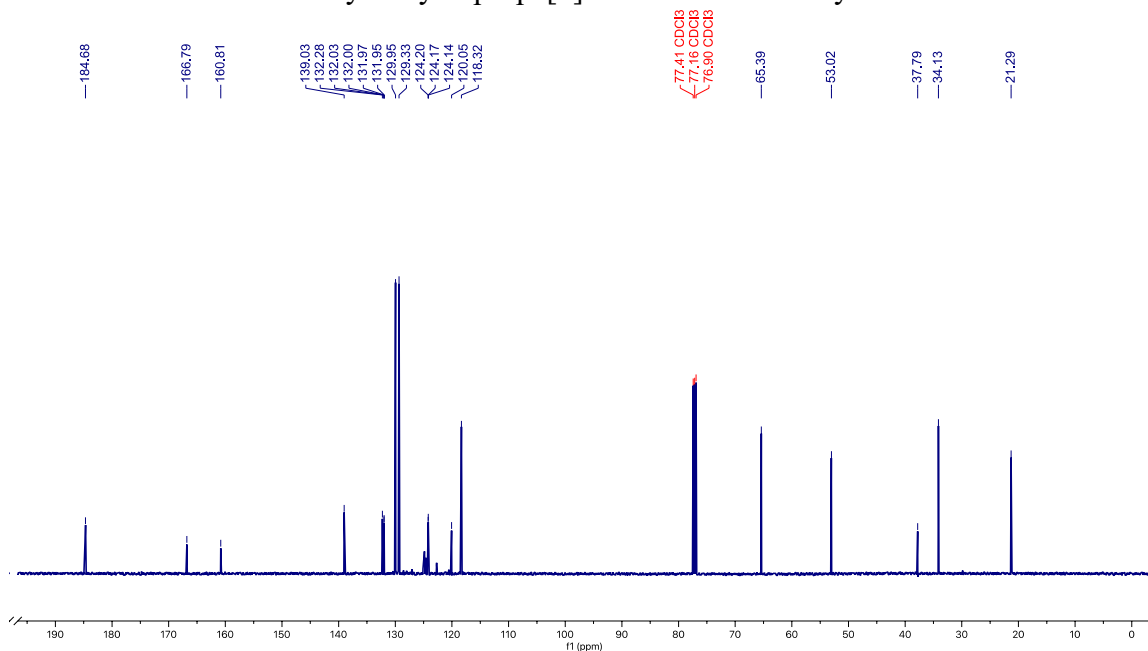

**<sup>1</sup>H NMR (500 MHz, CDCl<sub>3</sub>) Methyl 7-oxo-1-(p-tolyl)-6-(trifluoromethyl)-tetrahydrocyclopropa[b]chromene-1-carboxylate**

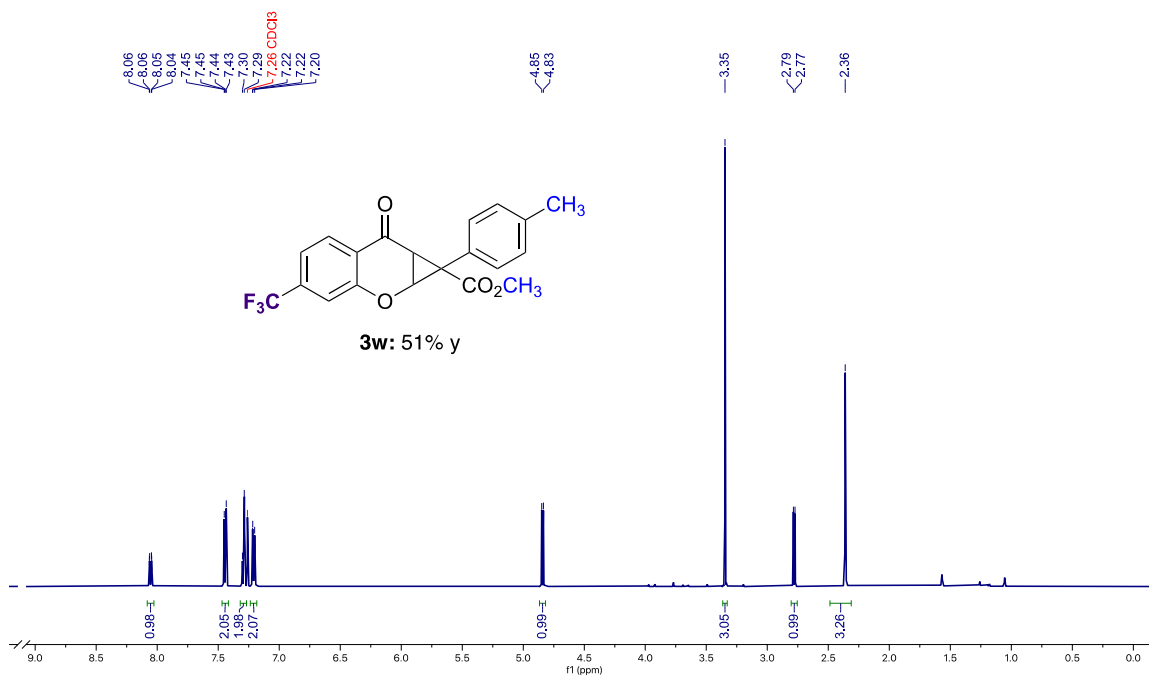

**<sup>13</sup>C NMR (126 MHz, CDCl<sub>3</sub>) Methyl 7-oxo-1-(p-tolyl)-6-(trifluoromethyl)-tetrahydrocyclopropa[b]chromene-1-carboxylate**

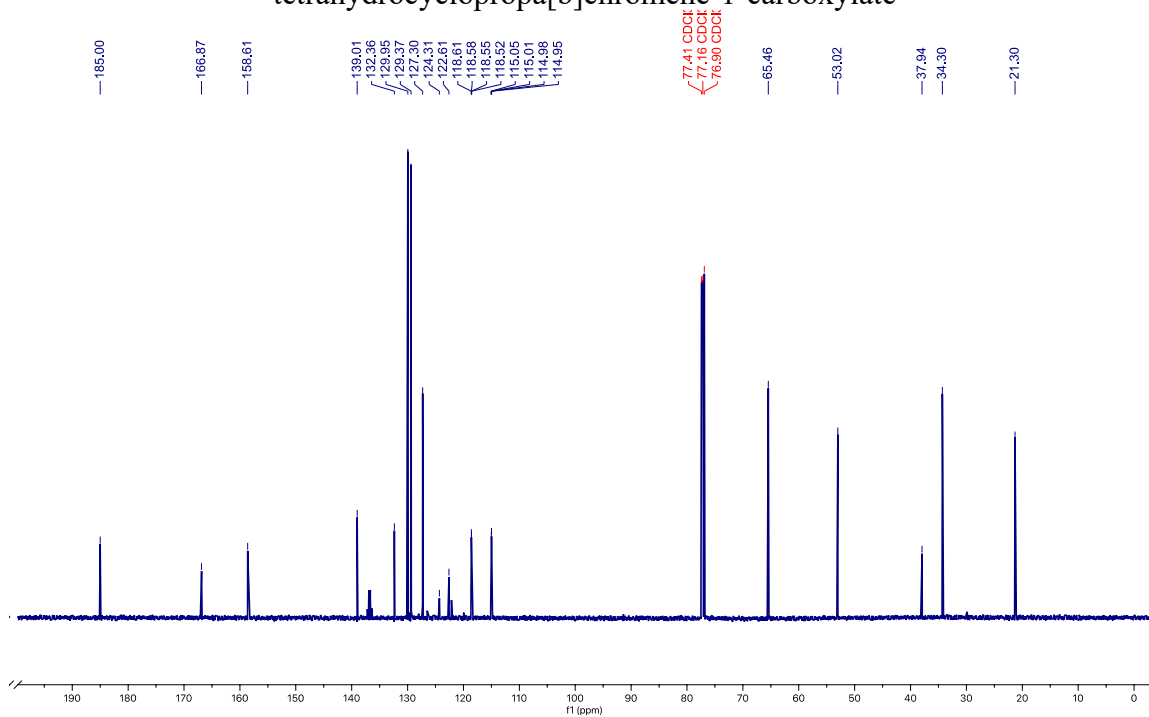

**<sup>1</sup>H NMR (500 MHz, CDCl<sub>3</sub>) 1-methyl 2-(2,2,2-trichloroethyl) 5-bromo-7-oxo-1-phenyl-tetrahydro-2H-cyclopropa[b]quinoline-1,2-dicarboxylate**

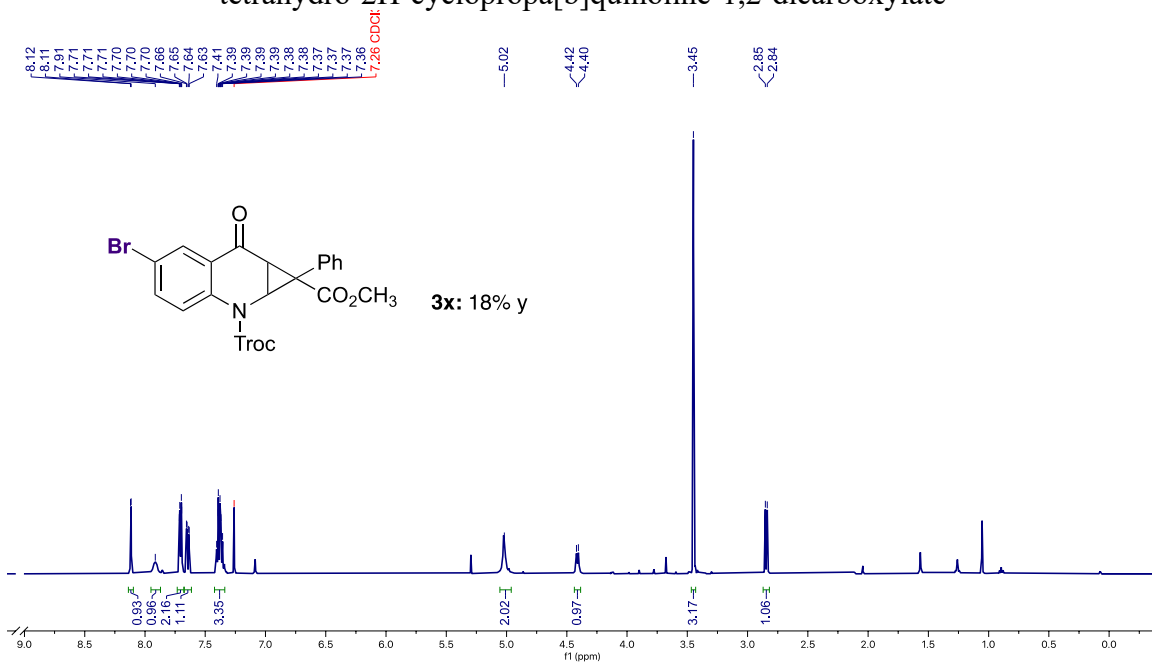

**<sup>13</sup>C NMR (126 MHz, CDCl<sub>3</sub>) 1-methyl 2-(2,2,2-trichloroethyl) 5-bromo-7-oxo-1-phenyl-tetrahydro-2H-cyclopropa[b]quinoline-1,2-dicarboxylate**

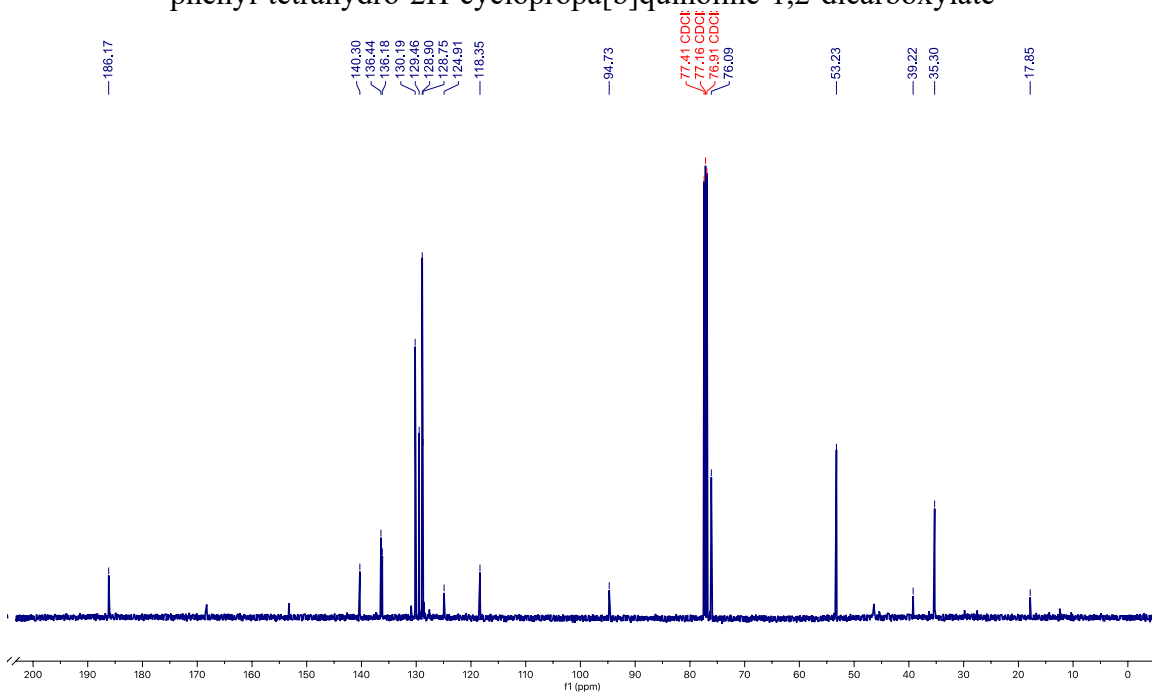



**$^1\text{H}$  NMR (500 MHz,  $\text{CDCl}_3$ ) 1-methyl 2-(2,2,2-trichloroethyl) 5-bromo-7-oxo-1-(p-tolyl)-tetrahydro-2H-cyclopropa[b]quinoline-1,2-dicarboxylate**

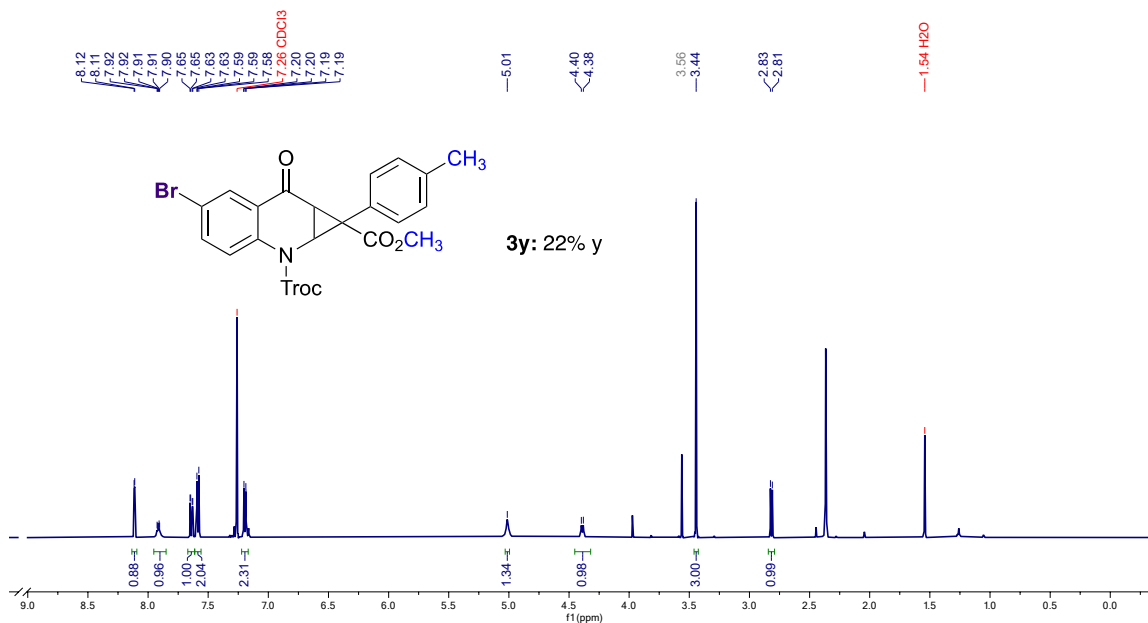

**$^{13}\text{C}$  NMR (126 MHz,  $\text{CDCl}_3$ ) 1-methyl 2-(2,2,2-trichloroethyl) 5-bromo-7-oxo-1-(p-tolyl)-tetrahydro-2H-cyclopropa[b]quinoline-1,2-dicarboxylate**

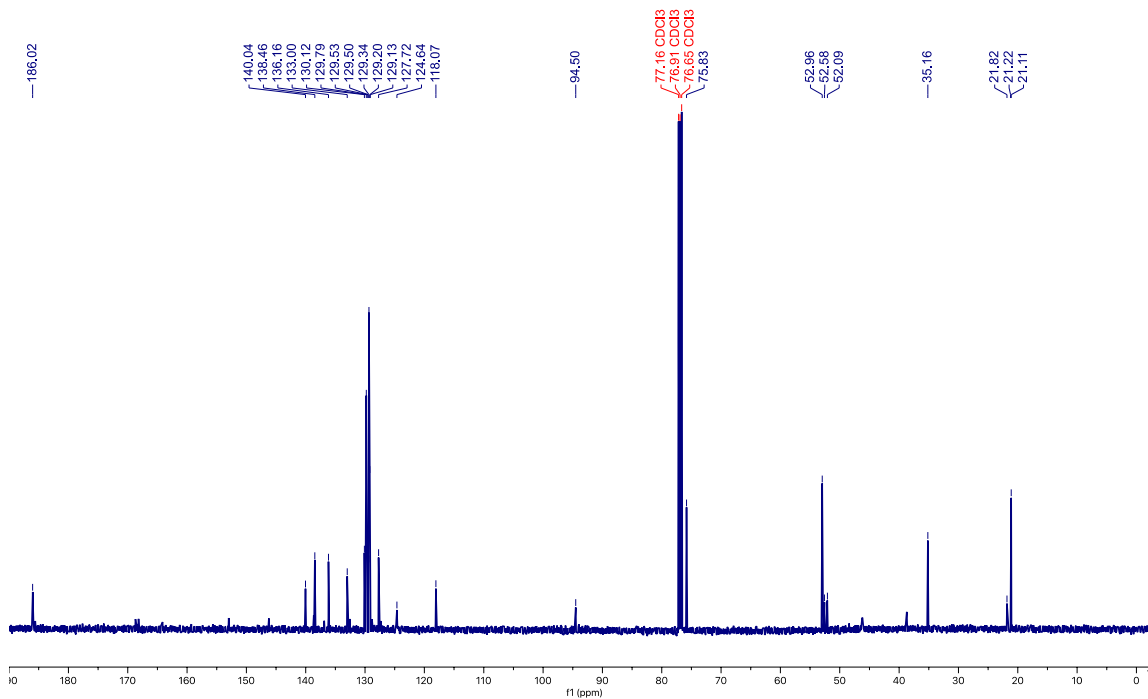

**<sup>1</sup>H NMR (500 MHz, CDCl<sub>3</sub>) Methyl 2-methoxy-5-oxo-3-phenyl-2,3,4,5-tetrahydrobenzo[b]oxepine-3-carboxylate**

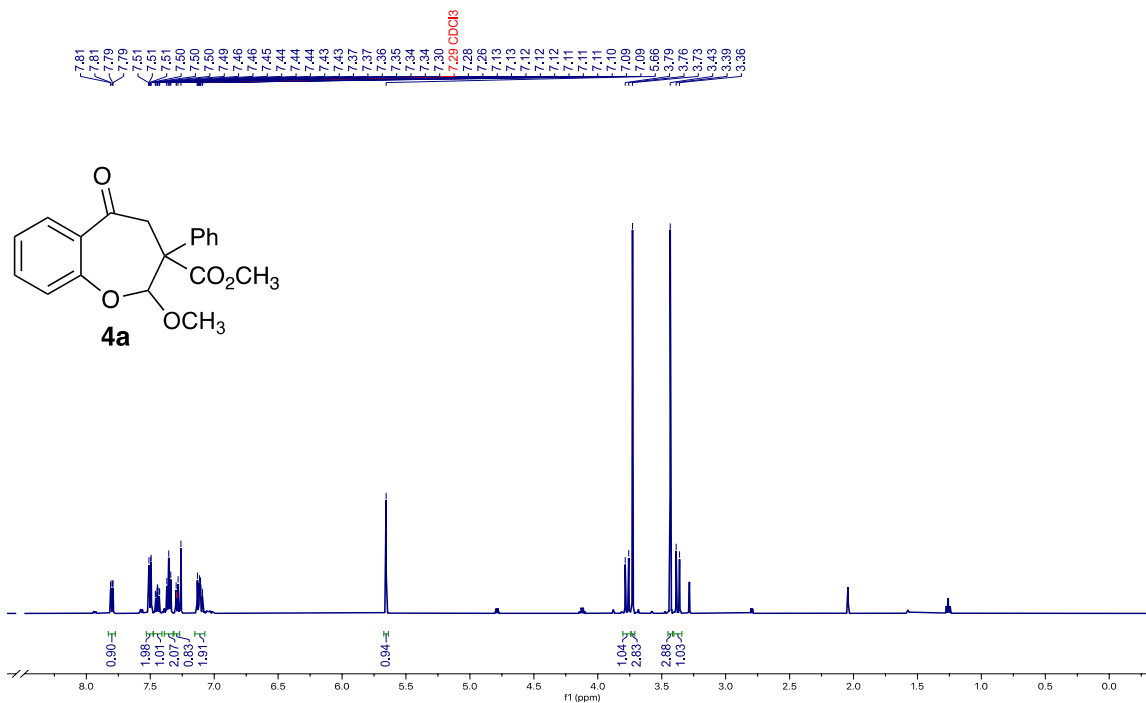

**<sup>13</sup>C NMR (126 MHz, CDCl<sub>3</sub>) Methyl 2-methoxy-5-oxo-3-phenyl-2,3,4,5-tetrahydrobenzo[b]oxepine-3-carboxylate**

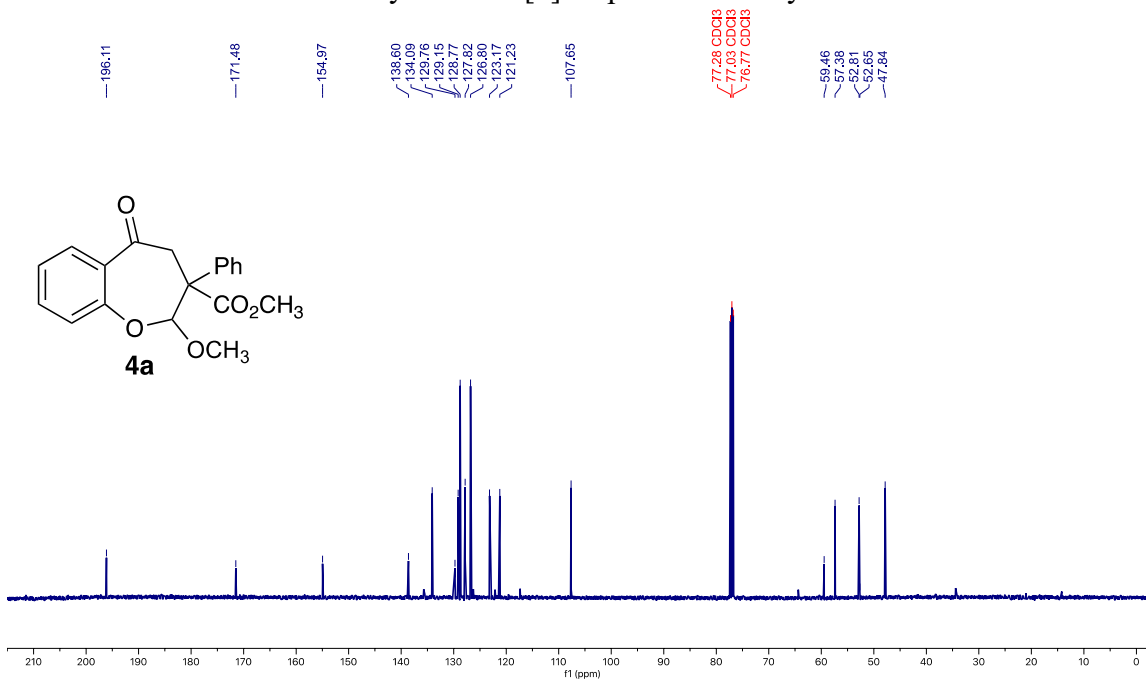

**$^1\text{H}$  NMR (500 MHz,  $\text{CDCl}_3$ ) 2,2,2-trichloroethyl 2-methoxy-5-oxo-3-phenyl-2,3,4,5-tetrahydrobenzo[b]oxepine-3-carboxylate**

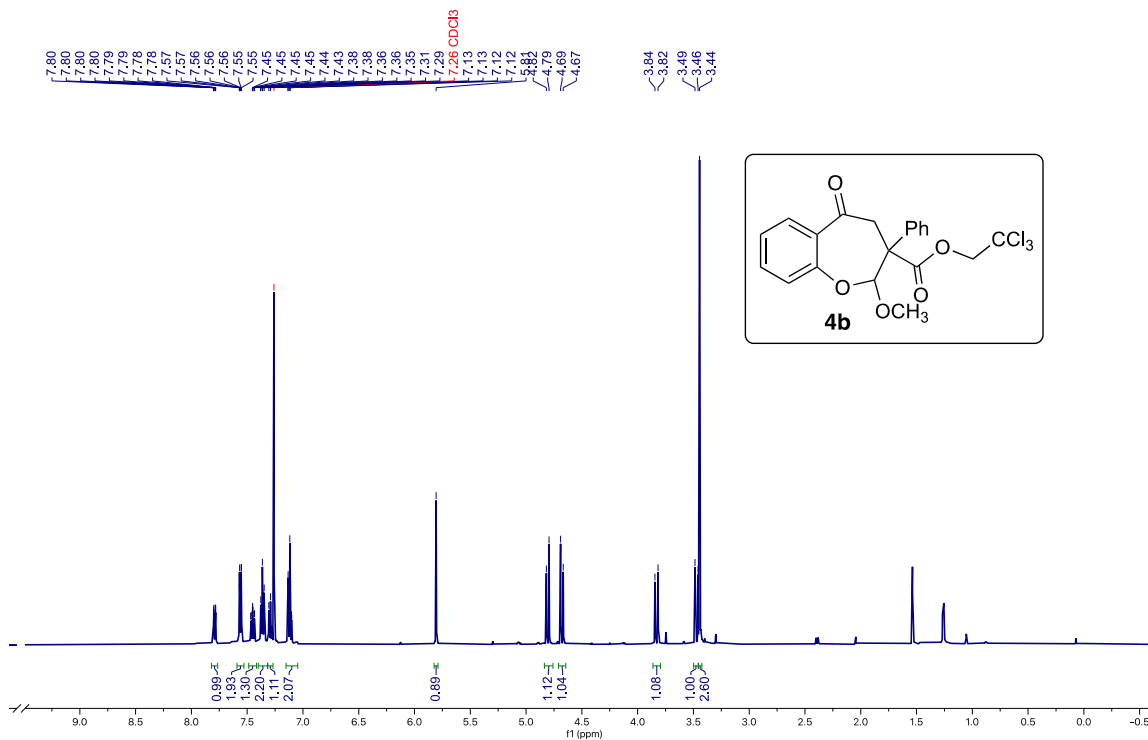

**$^{13}\text{C}$  NMR (126 MHz,  $\text{CDCl}_3$ ) 2,2,2-trichloroethyl 2-methoxy-5-oxo-3-phenyl-2,3,4,5-tetrahydrobenzo[b]oxepine-3-carboxylate**

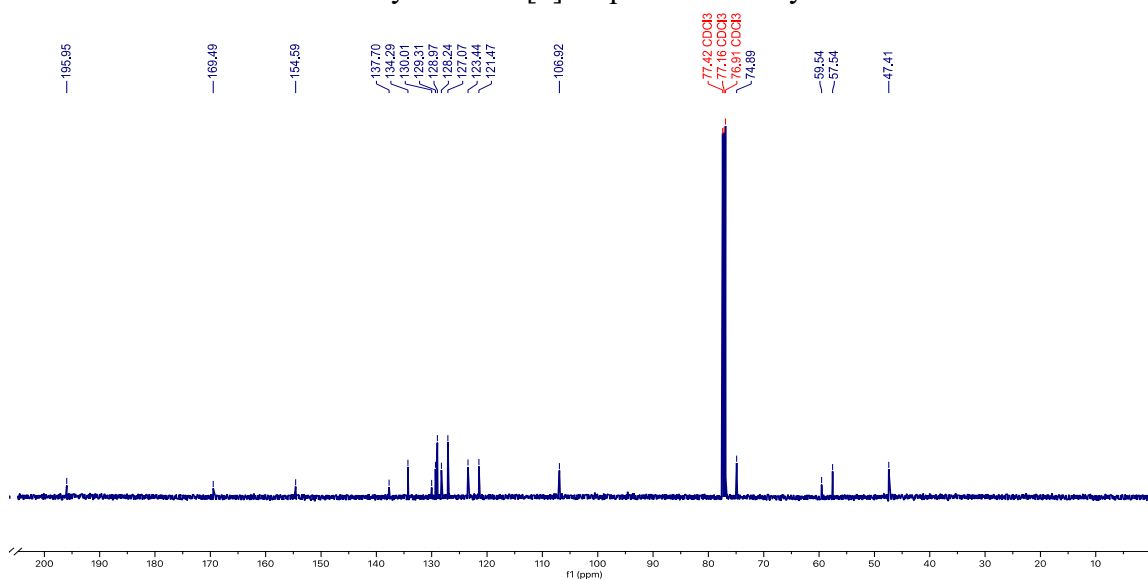

**<sup>1</sup>H NMR (500 MHz, CDCl<sub>3</sub>) Methyl 2-methoxy-5-oxo-3-(p-tolyl)-tetrahydrobenzo[b]oxepine-3-carboxylate**

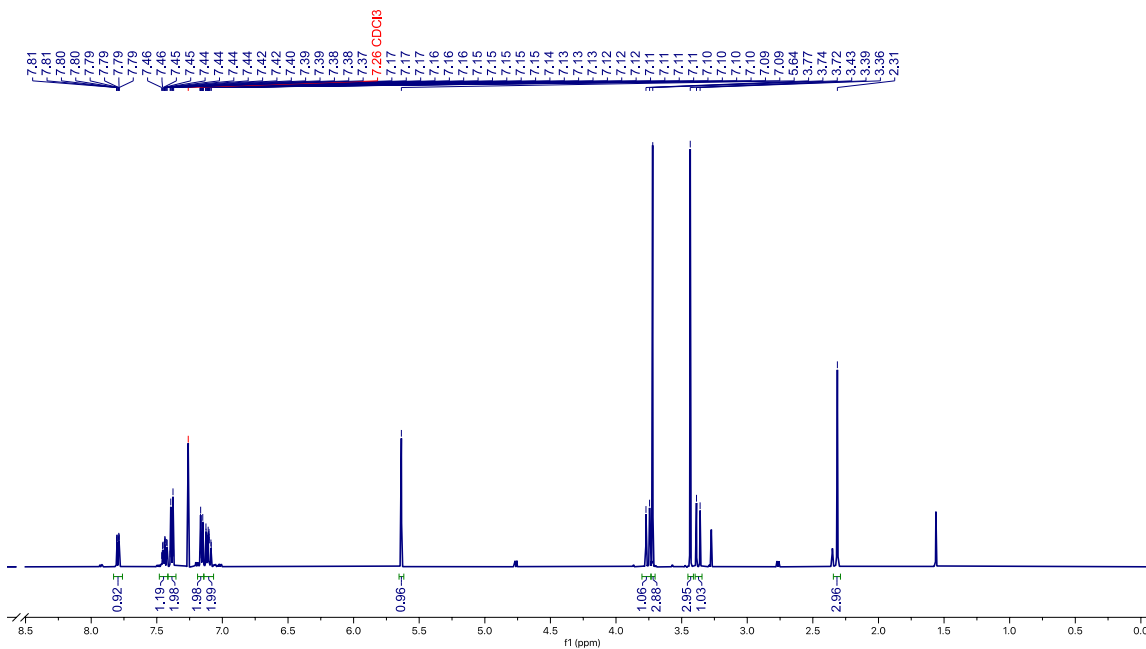

**<sup>13</sup>C NMR (126 MHz, CDCl<sub>3</sub>) Methyl 2-methoxy-5-oxo-3-(p-tolyl)-tetrahydrobenzo[b]oxepine-3-carboxylate**

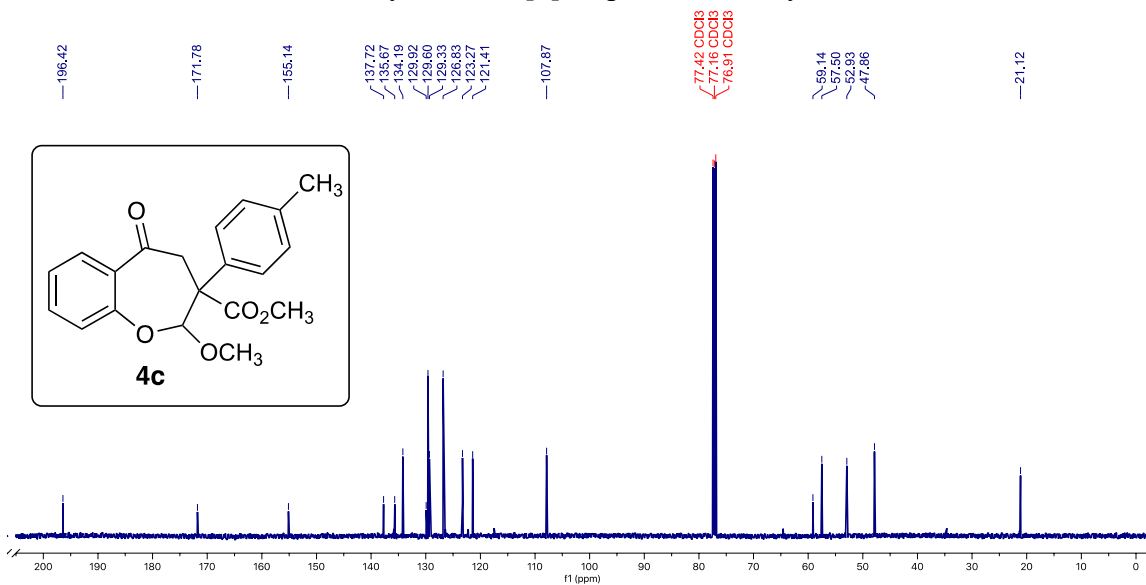

**<sup>1</sup>H NMR (500 MHz, CDCl<sub>3</sub>) 3-methyl 1-(2,2,2-trichloroethyl) 2-methoxy-5-oxo-3-(*p*-tolyl)-2,3,4,5-tetrahydro-1*H*-benzo[*b*]azepine-1,3-dicarboxylate**

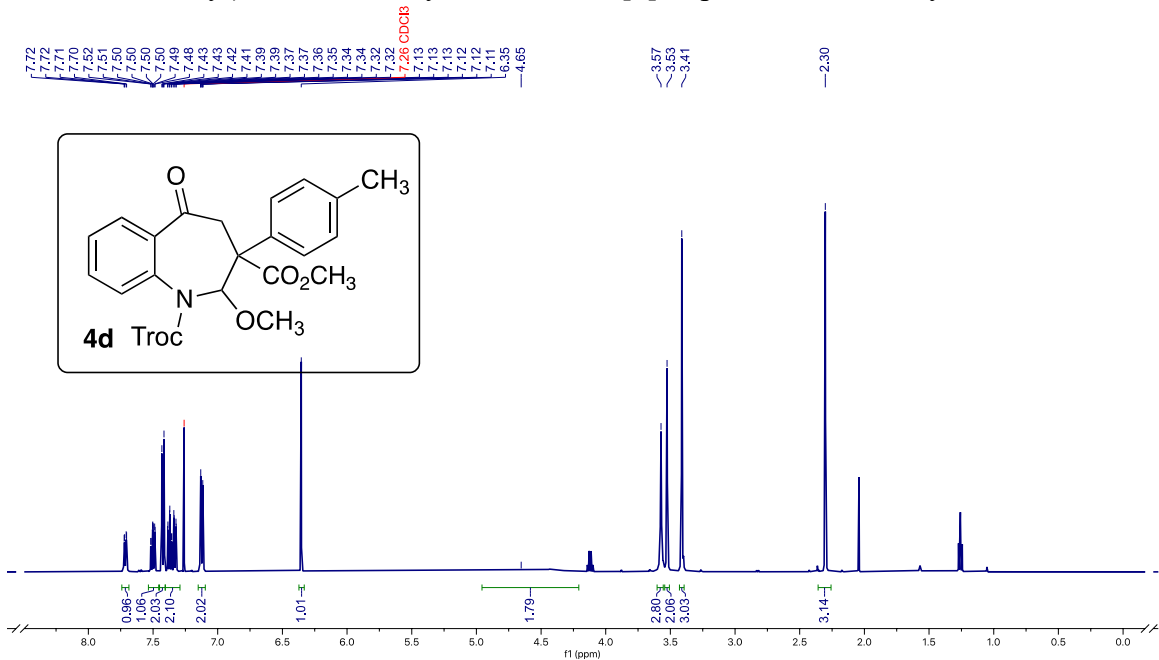

**<sup>13</sup>C NMR (126 MHz, CDCl<sub>3</sub>) 3-methyl 1-(2,2,2-trichloroethyl) 2-methoxy-5-oxo-3-(*p*-tolyl)-2,3,4,5-tetrahydro-1*H*-benzo[*b*]azepine-1,3-dicarboxylate**

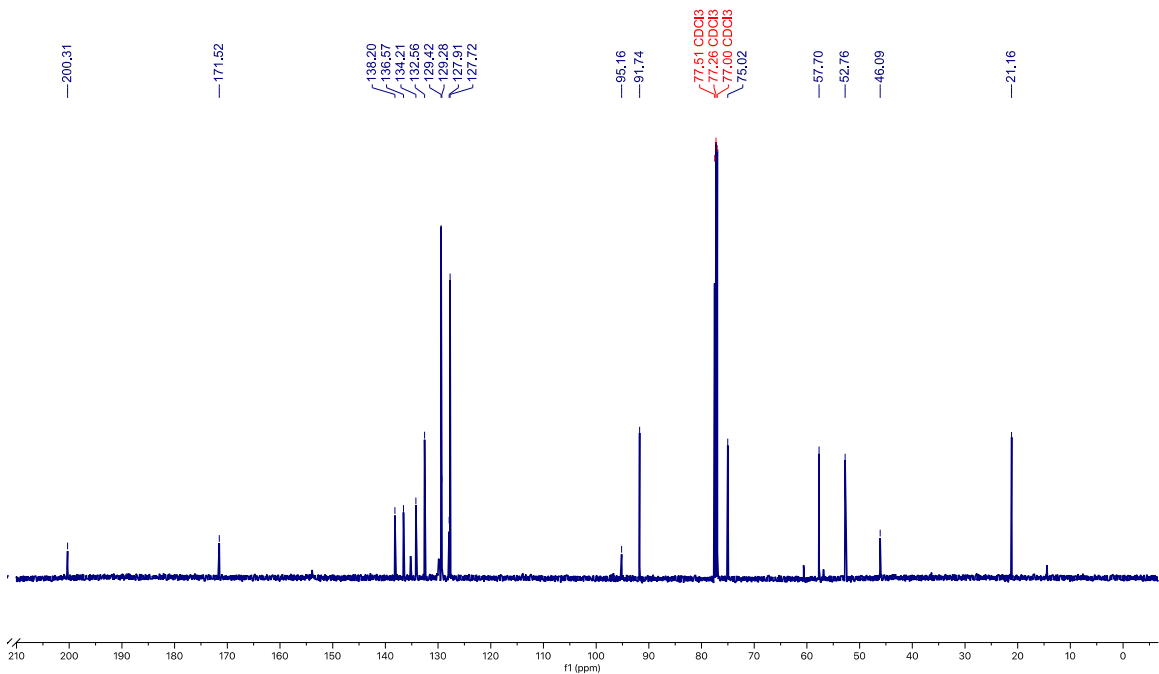

**$^1\text{H}$  NMR (500 MHz,  $\text{CDCl}_3$ ) Methyl 3-(3,5-dimethylphenyl)-2-methoxy-5-oxo-tetrahydrobenzo[b]oxepine-3-carboxylate**

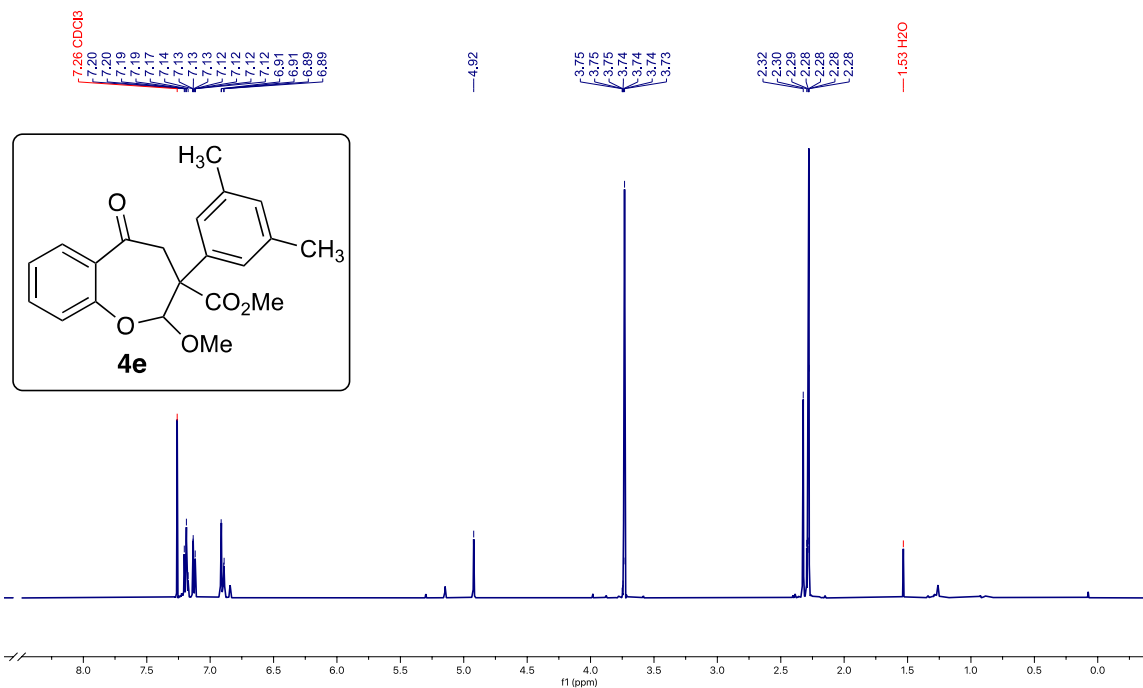

**$^{13}\text{C}$  NMR (126 MHz,  $\text{CDCl}_3$ ) Methyl 3-(3,5-dimethylphenyl)-2-methoxy-5-oxo-tetrahydrobenzo[b]oxepine-3-carboxylate**

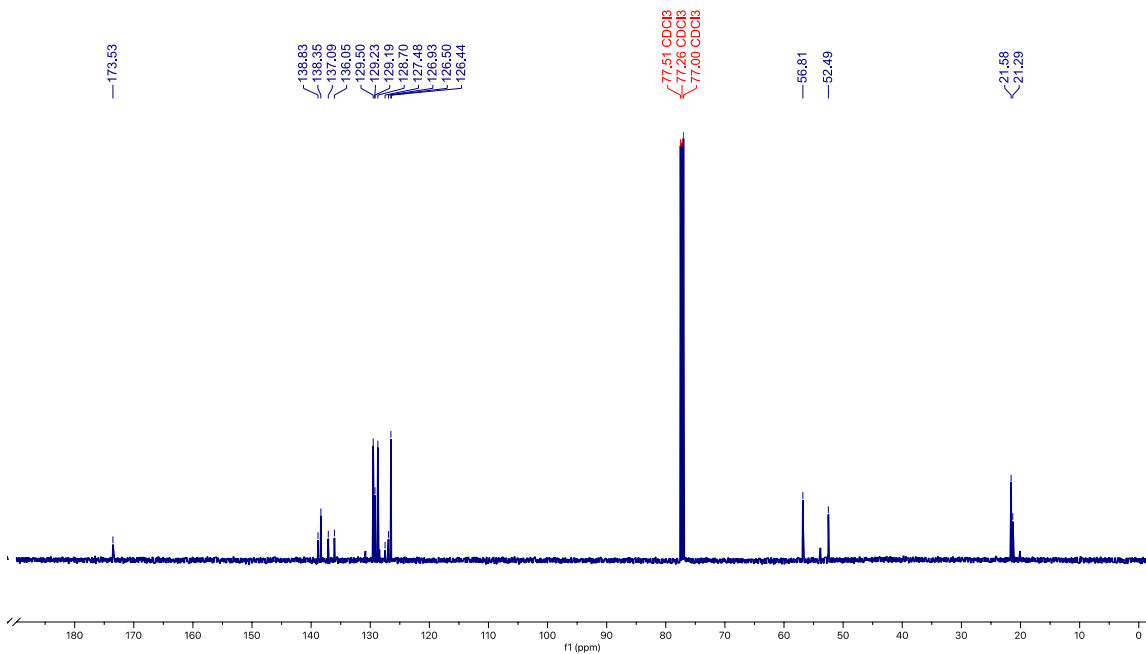

Supplement: d2cc02023h2.pdf [file d2cc02023h2.pdf]
